# Pitfalls in Post Hoc Analyses of Population Receptive Field Data

Susanne Stoll<sup>a,\*</sup>, Elisa Infanti<sup>a</sup>, Benjamin de Haas<sup>b</sup>, D. Samuel Schwarzkopf<sup>c</sup>

<sup>a</sup>*Experimental Psychology, University College London, 26 Bedford Way, London, WC1H 0AP, UK*

<sup>b</sup>*Abteilung Allgemeine Psychologie, Justus-Liebig-Universität Gießen, Otto-Behaghel-Str. 10F, 35394 Gießen, Germany*

<sup>c</sup>*School of Optometry and Vision Science, The University of Auckland, Private Bag 92019, Auckland 1142, New Zealand*

---

## Abstract

Data binning involves grouping observations into bins and calculating bin-wise summary statistics. It can cope with overplotting and noise, making it a versatile tool for comparing many observations. However, data binning goes awry if the same observations are used for binning (selection) and contrasting (selective analysis). This creates circularity, biasing noise components and resulting in artifactual changes in the form of regression towards the mean. Importantly, these artifactual changes are a statistical necessity. Here, we use (null) simulations and empirical repeat data to expose this flaw in the scope of post hoc analyses of population receptive field data. In doing so, we reveal that the type of data analysis, data properties, and circular data cleaning are factors shaping the appearance of such artifactual changes. We furthermore highlight that circular data cleaning and circular sorting of change scores are selection practices that result in artifactual changes even without circular data binning. These pitfalls might have led to erroneous claims about changes in population receptive fields in previous work and can be mitigated by using independent data for selection purposes. Our evaluations highlight the urgency for us researchers to make the validation of analysis pipelines standard practice.

*Keywords:* regression towards the mean, circularity, double-dipping, validation, functional magnetic resonance imaging

---

---

\*Corresponding author

*Email address:* [stollsus@gmail.com](mailto:stollsus@gmail.com) (Susanne Stoll)

## Graphical abstract

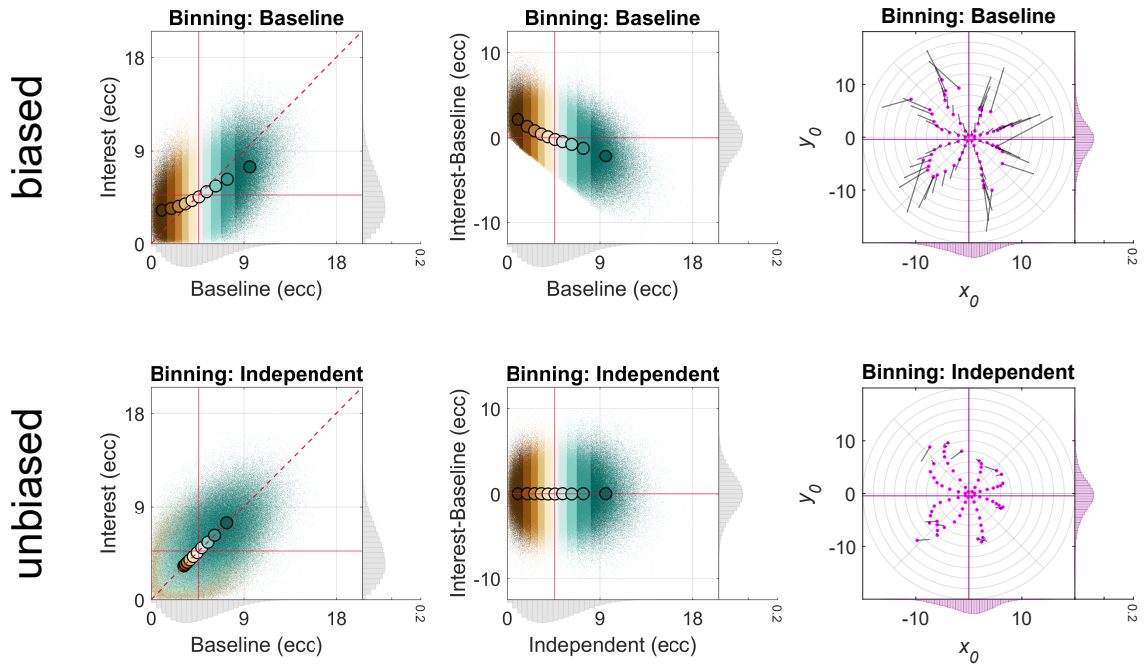

## Highlights

- Circular data binning produces artifactual changes in the form of regression towards the mean
- Analysis type, data properties, and circular data cleaning shape these artifactual changes
- Circular data cleaning and sorting produce artifactual changes even without circular data binning
- These pitfalls can lead to faulty claims about changes in population receptive fields

## 1 Introduction

Data binning refers to grouping observations into bins or subgroups and calculating bin-wise summary statistics, such as the arithmetic mean. It is often applied to large datasets in order to prevent overplotting and control noise. As such, data binning has become commonplace in population receptive field (pRF) modeling (Dumoulin and Knapen, 2018; Dumoulin and Wandell, 2008), where researchers are commonly interested in comparing visual field maps with thousands of observations between different (experimental) conditions. However, pRF modeling is only one out of several research areas where some form of differential data binning has been adopted (e.g., Gignac and Zajenkowski, 2020; Holmes, 2009; Kriegeskorte et al., 2009; Preacher et al., 2005; Shanks, 2017).

Although data binning can help us see an overall pattern in the face of an abundance of details, it goes awry if the same observations are used for *binning* (selection) and *contrasting* (selective analysis). This is because dipping into noise-tainted data (i.e., most data) more than once violates assumptions of independence, favoring some noise components over others and eventually biasing descriptive and inferential statistics (Kriegeskorte et al., 2009). As such, double-dipping in data binning prevents us from – amongst other things – controlling for *regression towards the mean* (e.g., Galton, 1886; Gignac and Zajenkowski, 2020; Holmes, 2009; Makin and De Xivry, 2019; Shanks, 2017; Stigler, 1997).

Regression towards the mean is a statistical artifact occurring when two variables are imperfectly correlated (e.g., due to random noise<sup>1</sup>). In this case, extreme observations for one variable will on average be less extreme for the other<sup>2</sup> (e.g., Campbell and Kenny, 1999; Cohen et al., 2003; Galton, 1886; Shanks, 2017; Stigler, 1997). The magnitude of regression towards the mean tends to be higher the lower the correlation between the variables (e.g., Campbell and Kenny, 1999, for systematic simulations, see Holmes 2009).

Double-dipping and/or regression towards the mean are of particular concern in what is known as *post hoc subgrouping* (Preacher et al., 2005), *post hoc data selection* (Shanks, 2017), and *extreme groups approach* (Preacher et al., 2005), all of which can be considered as subtypes of data binning. Post hoc subgrouping refers to collecting two measures, defining extreme subgroups post hoc using one measure (e.g., the lower and upper quantile), and then performing statistics on these measures for the extreme subgroups (Preacher et al., 2005). Post hoc data selection is similar but involves only one extreme subgroup (Shanks, 2017). Both of these practices are different from the extreme groups approach, where extreme subgroups are selected a priori based on one measure; that is, without collecting the whole range of the other measure (Preacher et al., 2005). Here, we focus on a post hoc scenario

---

<sup>1</sup>Note that random noise is only one factor weakening the correlation between two variables (for more details, see Shanks, 2017).

<sup>2</sup>To be precise, regression towards the mean refers to standard scores (z-scores; Campbell and Kenny, 1999; Kenny, 2005)

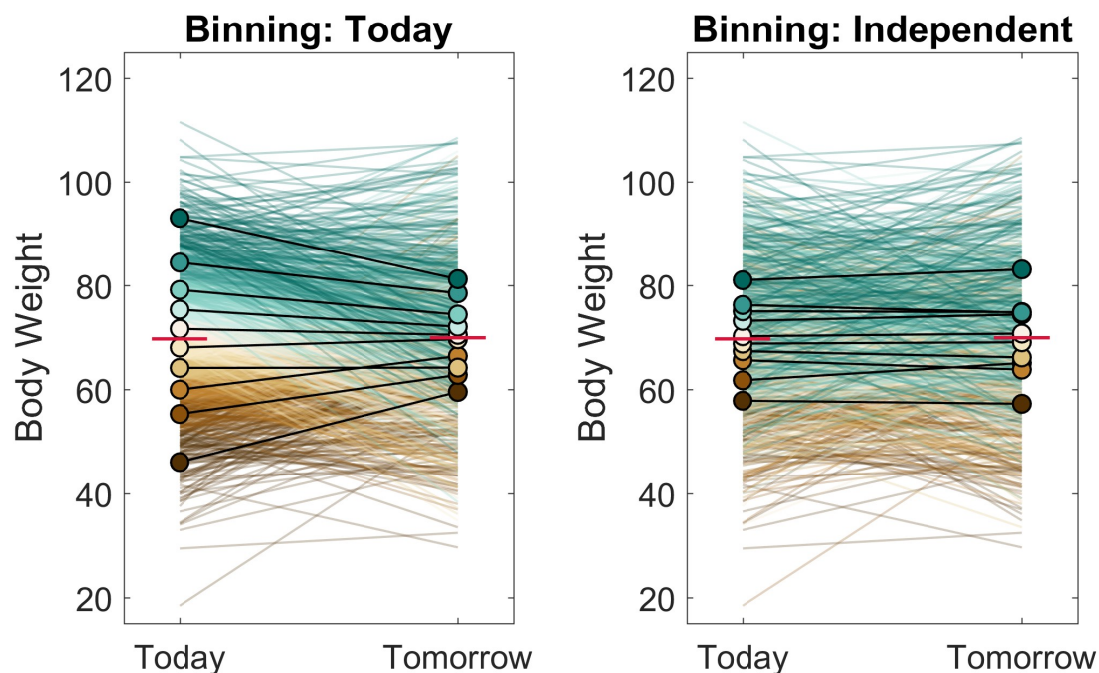

**Figure 1. Simulated post hoc binning analysis on fictive body weight data.** Bin-wise fictive body weight data and means for Today and Tomorrow in the same group of adults and different data binning scenarios. Body weight data for Today and Tomorrow were either binned according to body weight data for Today (1<sup>st</sup> column) or an Independent test occasion (2<sup>nd</sup> column). Fictive body weight data were simulated by sampling the body weight of 1000 adults from a Gaussian distribution ( $M = 70$  kg;  $SD = 10$  kg) and disturbing each adult's body weight with random Gaussian noise ( $SD = 10$  kg), separately for each test occasion (Today, Tomorrow, and Independent). The red horizontal lines indicate the location of the overall mean for Today and Tomorrow. Dark brown colors correspond to lower and dark blue-green colors to higher decile bins. The endpoints of the colorful lines represent individual data points and the colorful dots with the black outline bin-wise means. Note that the graphs displayed here are referred to as Galton squeeze diagrams (Campbell and Kenny, 1999; Galton, 1886; Shanks, 2017).

35 where essentially all subgroups are considered, not just the extreme ones (see also Gignac  
36 and Zajenkowski, 2020; Holmes, 2009). We label this procedure including its subtypes *post*  
37 *hoc binning analysis*.

38 An intuitive way to think about the link between double-dipping, regression towards the  
39 mean, and post hoc binning are repeat data. Assume we measure body weight in a population  
40 of adults twice – Today and Tomorrow (see endpoints of colorful lines, Figure 1; 1<sup>st</sup> column).  
41 Further assume that any weight we measure involves a *permanent* and a *transient* component  
42 (true value + random noise). When determining Today's and Tomorrow's overall mean  
43 weight, all things being equal, the permanent component persists and the transient component  
44 cancels out (see red horizontal lines, Figure 1, 1<sup>st</sup> column). However, this is not the case when  
45 we select adults with extremely high measurements for Today (relative to the overall mean)  
46 and compare these measurements to Tomorrow's in the same adults by calculating the means

47 (see lines and dots in dark green color, [Figure 1](#), 1<sup>st</sup> column). This is because we used  
48 Today's measurements twice: for selection (binning) and selective analysis (comparing bin-  
49 wise means). We therefore favored Today's noise components over Tomorrow's. Why is this?  
50 The noise components of our selection criterion are not independent of the noise components  
51 of Today's measurements. This renders the subgroup we selected Today on average heavier  
52 than it really is. This is not the case for Tomorrow's measurements. As a result, Tomorrow's  
53 measurements for this subgroup regress on average to Tomorrow's overall mean (see dots  
54 in dark green color, [Figure 1](#), 1<sup>st</sup> column; for a similar example see [Stigler, 1997](#)). This  
55 artifactual change in average weight might look like a real phenomenon, although – of course  
56 – it is not.

57 The analysis we just performed can be regarded as an instantiation of post hoc data  
58 selection involving one extreme subgroup. If we additionally select a subgroup of adults with  
59 extremely low measurements for Today (see lines and dots in dark brown color, [Figure 1](#),  
60 1<sup>st</sup> column), regression towards the overall mean from below occurs for this subgroup. Such  
61 an approach would qualify as post hoc subgrouping involving two extreme subgroups. If  
62 we incorporate additional less extreme subgroups, we perform a full-blown post hoc binning  
63 analysis (see lines and dots in various colors, [Figure 1](#), 1<sup>st</sup> column), where the bin-wise  
64 means for Tomorrow's measurements regress towards the overall mean to various degrees.  
65 Importantly, this regression artifact is a statistical necessity not hinging upon body weight  
66 data. Once we use Independent data for binning purposes (e.g., body weight measurements  
67 collected for the day after tomorrow), we break the circularity, and the regression artifact  
68 disappears ([Figure 1](#), 2<sup>nd</sup> column).

69 How does all of this relate to post hoc analyses involving pRF data? Imagine we conduct  
70 a retinotopic mapping experiment ([Dumoulin and Wandell, 2008](#)), where we estimate pRF  
71 position and pRF size for each voxel in the visual brain under a *Baseline* condition as well  
72 as a condition of *Interest* (see [Figure 2](#) for a single pRF). We can think of the Interest and  
73 Baseline conditions as repeat data (e.g., [Benson et al., 2018](#); [Senden et al., 2014](#); [van Dijk  
74 et al., 2016](#)), different attention conditions (e.g, [de Haas et al., 2014, 2020](#); [Klein et al., 2014](#);  
75 [van Es et al., 2018](#); [Vo et al., 2017](#)), mapping sequences (e.g., [Binda et al., 2013](#); [Infanti and  
76 Schwarzkopf, 2020](#)), mapping stimuli (e.g., [Alvarez et al., 2015](#); [Binda et al., 2013](#); [Le et al.,  
77 2017](#); [Yildirim et al., 2018](#)), magnetic field strengths (e.g., [Morgan and Schwarzkopf, 2020](#)),  
78 scotoma conditions (e.g., [Barton and Brewer, 2015](#); [Binda et al., 2013](#); [Haak et al., 2012](#);  
79 [Prabhakaran et al., 2020](#)), and pRF modeling techniques (e.g., [Carvalho et al., 2020](#)) – to  
80 name but a few examples. Similarly, apart from visual scenarios, we can also interpret the  
81 Baseline and Interest condition as adaptation conditions (e.g., [Tsouli et al., 2021](#)), different  
82 finger movements (e.g., [Schellekens et al., 2018](#)), or uni- and multisensory conditions (see  
83 [Holmes, 2009](#), for a discussion on non-pRF work).

84 As a pRF model, we adopt a 2D Gaussian, where pRF position represents the center  
85 of a pRF in visual space (the center of the Gaussian) and pRF size its spatial extent (the  
86 standard deviation of the Gaussian; see [Figure 2](#)). We then fit this model to the voxel-wise

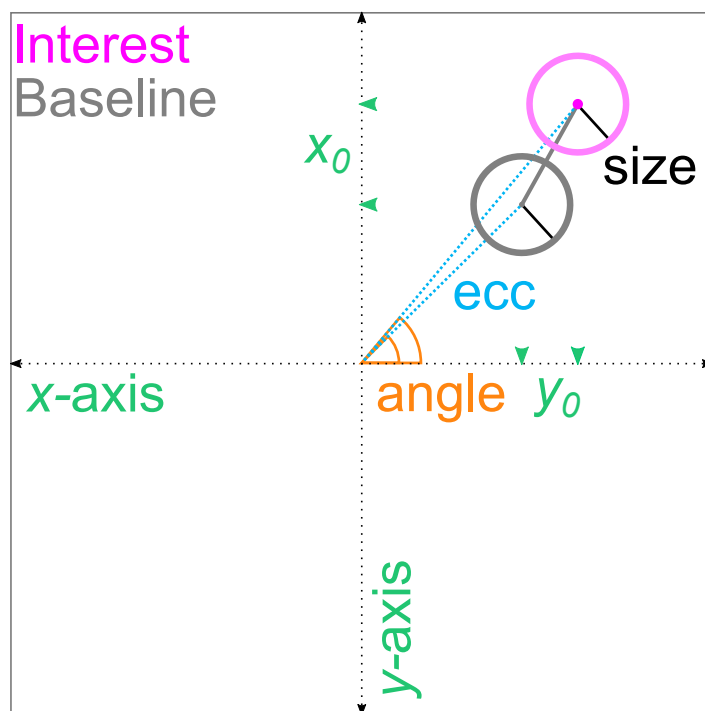

**Figure 2. Population receptive field estimates.** The large black square outline represents a cutout of the visual field and the black dashed arrows a Cartesian coordinate system. The two circles represent a pRF that changes its position (gray solid line) in an Interest (magenta) compared to a Baseline (gray) condition. The pRF was modeled as a 2D Gaussian function. The center of the 2D Gaussian (midpoint of the gray and magenta circles) represents the position of the pRF. PRF position can be expressed in terms of  $x_0$  and  $y_0$  coordinates (green arrow heads) or eccentricity (blue dashed line) and polar angles (orange solid line). Eccentricity corresponds to the Euclidean distance between the center of gaze (origin) and the center of the 2D Gaussian. Polar angle corresponds to the counter-clockwise angle running from the positive  $x$ -axis to the eccentricity vector. The standard deviation of the Gaussian ( $1\sigma$ ; black solid line) represents pRF size. Both pRF position and size are typically expressed in degrees of visual angle. Polar angles are typically expressed in degrees. Ecc = Eccentricity. pRF = Population receptive field.

87 brain responses we measured in the retinotopic mapping experiment (Dumoulin and Wandell,  
88 2008). To compare pRF positions in the Interest and Baseline condition voxel-by-voxel, we  
89 bin the pRF positions from both conditions according to the pRF positions from the Baseline  
90 condition. Subsequently, we quantify for each voxel the position shift from the Baseline to  
91 the Interest condition (see Figure 2 for a single pRF). Finally, we calculate the bin-wise mean  
92 shift. This is equivalent to calculating the bin-wise simple means for each condition and  
93 comparing them subsequently.

94 Either way, by adopting such a post hoc binning analysis, we essentially assume that  
95 binning voxels according to pRF positions from the Baseline condition and aggregating them  
96 subsequently for this condition ensures that bin-wise noise components are unbiased on av-  
97 erage (see also Shanks, 2017). This, however, is not the case. The underlying reason is the

98 same as for our body weight analysis further above: we dipped into the Baseline condition  
99 twice, namely to define bins (selection) and to estimate bin-wise means for further compari-  
100 son (selective analysis). This circularity leads to a favoring of noise components, skewing the  
101 bin-wise means in the Baseline condition and eventually resulting in regression towards the  
102 overall mean for the bin-wise means of the Interest condition.

103 Here, we expose and explore this flaw in the scope of post hoc analyses of pRF data using  
104 (null) simulations and empirical repeat data from the Human Connectome Project (HCP;  
105 [Benson et al., 2018, 2020](#)). Unlike empirical data, simulations allowed us to separate true  
106 values from noise components. They also provided an excellent test bed for determining that  
107 the type of data analysis (change scores or simple scores, 1D or 2D binning, equidistant or  
108 decile binning), data properties (presence or absence of heteroskedasticity or a true effect)  
109 and additional circular selection practices (presence or absence of circular data cleaning)  
110 influence the appearance of the regression artifact. Moreover, they allowed us to pinpoint  
111 that circular data cleaning and circular sorting of change scores represent selection practices  
112 that yield artifactual changes even without circular data binning. Unlike empirical data from  
113 different experimental conditions, repeat data permitted us to assume a null effect between  
114 conditions, allowing for more straightforward conclusions about any systematic differences  
115 we might observe.

## 116 2. Methods

### 117 2.1. Post hoc binning using simulated data

118 For the post hoc binning analysis involving simulations, we used an empirical V1 visual  
119 field map of a single human participant as a basic data distribution. This map originated  
120 from a functional magnetic resonance imaging experiment (fMRI) aimed at mapping pRFs  
121 under different attention conditions using a drifting bar stimulus (2 sessions each with 4  
122 runs per condition). One of these conditions was selected for simulation purposes. The  
123 maximal eccentricity of the mapping area subtended 8.5 degrees of visual angle (dva). We fit  
124 a 2D Gaussian function to preprocessed fMRI responses projected onto the cortical surface.  
125 For each vertex (gray matter node on the cortical surface), we obtained 6 estimates: pRF  
126 position ( $x_0$  and  $y_0$  coordinates), pRF size ( $\sigma$ ), pRF baseline ( $\beta_0$ ), pRF amplitude ( $\beta_1$ ),  
127 and goodness-of-fit ( $R^2$ ). We first smoothed the resulting parameter maps and delineated  
128 V1 hemifield maps manually (for more details, see Supplementary methods, 1. [Retinotopic  
129 mapping experiment](#)). We then pooled the  $x_0$  and  $y_0$  coordinates across V1 hemifield maps  
130 and removed empty data points.

#### 131 2.1.1. 1D post hoc binning analysis on eccentricity

132 To uncover the regression artifact, we first simulated a simplified contrast scenario with a  
133 null effect. To this end, we disturbed the  $x_0$  and  $y_0$  coordinates ([Figure 2](#)) 200 times with  
134 random Gaussian noise ( $SD = 2$  dva). We repeated this to generate a *Baseline*, *Interest*, and



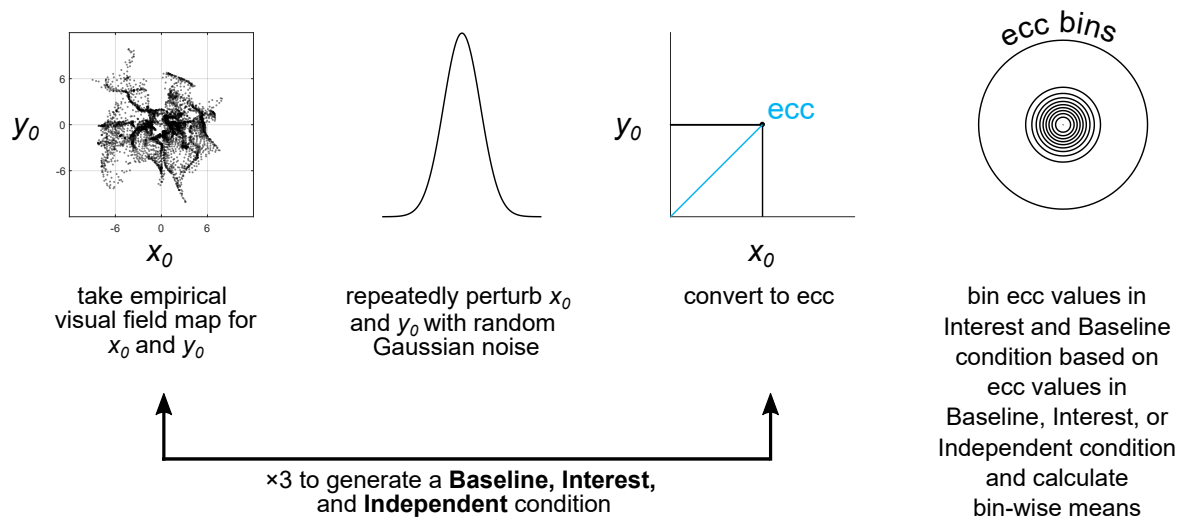

Figure 3. Schematic workflow of 1D post hoc binning analysis on simulated eccentricity data | Null effect. Ecc = Eccentricity.

135 *Independent* condition. We then converted the  $x_0$  and  $y_0$  coordinates to eccentricity values  
 136 (Figure 2), as is often done in the pRF literature (see Figure S1 for interpretational difficulties  
 137 with eccentricity when it comes to position shifts). This resulted in a gamma-like eccentricity  
 138 distribution. Lastly, we binned the eccentricity values in the Baseline and Interest condition  
 139 according to the eccentricity values of any of the 3 conditions using deciles and calculated the  
 140 bin-wise means<sup>3</sup>. A schematic workflow of this simulated 1D post hoc binning analysis can  
 141 be found in Figure 3. Bin-wise eccentricity means were visualized as a color-coded scatter  
 142 plot along with individual observations per bin and marginal histograms (bin width = 0.5  
 143 dva) reflecting the simulated distributions.

144 Building upon the simulated null effect, we performed the 1D post hoc binning analysis  
 145 on 4 more simulation cases: a null effect with condition cross-thresholding based on the  
 146 Baseline condition, a null effect with condition cross-thresholding based on both the Baseline  
 147 and Interest condition, a null effect with eccentricity-dependent noise, and a true effect. We  
 148 use the term 'condition cross-thresholding' to refer to the pair-wise or list-wise deletion of

<sup>3</sup>Note that when evaluating data distributions with unequal means, variances, or non-linearity,  $z$ -standardization might be necessary to detect regression towards or away from the mean (Campbell and Kenny, 1999; Shanks, 2017). In particular,  $z$ -standardization makes data distributions directly comparable. As such, bin-wise means should regress to wherever they intersect the identity line. Here, we always display data in native space, as this is typically done in the pRF literature. However, we use crosshairs to indicate the location of the mean and thus provide a visual guideline.

149 data points across experimental conditions (see below). The selected simulation cases reflect  
150 analysis practices and data properties we consider characteristic of pRF studies. For all  
151 simulation cases, the Independent condition consisted of a second draw (resample) of the  
152 Baseline condition. Moreover, to ensure reproducibility and comparability, all simulation  
153 cases were based on the same seed for random number generation. However, our conclusions  
154 do not depend on the choice of seed for random number generation.

155 For the simulation cases involving condition cross-thresholding, we removed simulated  
156 observations falling outside a certain eccentricity range ( $\geq 0$  and  $\leq 6$  dva) in the Baseline or  
157 Baseline and Interest condition from all conditions (i.e., Baseline, Interest, and Independent).  
158 For the simulation case involving eccentricity-dependent noise, we used a small standard  
159 deviation ( $SD = 0.25$  dva) of random Gaussian noise to disturb empirical observations with  
160 smaller eccentricities ( $\geq 0$  and  $< 3$  dva) and a larger standard deviation ( $SD = 2$  dva) to  
161 disturb empirical observations with larger eccentricities ( $\geq 3$  dva). For the simulation case  
162 involving a true effect, we induced a radial increase in eccentricity of 2 dva in the Interest  
163 condition.

164 Apart from simple bin-wise means, we performed the 1D post hoc binning analysis also  
165 on change scores. The change scores were obtained by subtracting individual simulated  
166 observations or means in the Baseline condition from those in the Interest condition. Both  
167 simple means and mean change scores have been used for post hoc binning in previous pRF  
168 studies (e.g., [Barton and Brewer, 2015](#); [Binda et al., 2013](#); [Carvalho et al., 2020](#); [Haak et al.,  
2012](#); [Yildirim et al., 2018](#); [de Haas et al., 2014, 2020](#); [Prabhakaran et al., 2020](#); [Tsouli et al.,  
2021](#)). Similarly, we repeated the binning analysis using equidistant instead of decile binning.  
170 To this end, we used a constant bin width of 1.75 dva and an overall binning range of 0 to  
171 19.25 dva eccentricity. Unlike equidistant binning, decile binning ensures a roughly equal  
172 number of data points in each bin, which facilitates the interpretation of results. However,  
173 we consider equidistant binning as the most common binning type in the pRF literature. For  
174 both the change score analysis and equidistant binning, we used the simulation case involving  
175 a null effect as a data basis.  
176

### 177 *2.1.2. 2D post hoc binning analysis on $x_0$ and $y_0$*

178 Apart from the 1D binning analysis on eccentricity, we also conducted a 2D binning analysis  
179 on the simulated  $x_0$  and  $y_0$  values. To this end, we converted the  $x_0$  and  $y_0$  values to  
180 polar coordinates, that is, polar angle and eccentricity ([Figure 2](#)). We then binned the  $x_0$   
181 and  $y_0$  values in the Baseline or Interest condition according to their polar coordinates in  
182 the Baseline, Interest, or Independent condition using equidistant bins and calculated the  
183 bin-wise  $x_0$  and  $y_0$  means for each condition. The condition-wise means were visualized as  
184 vector graphs along with marginal histograms (bin width = 0.5 dva) illustrating the simulated  
185 distributions. Vector graphs have been used in prior pRF work (e.g., [Klein et al., 2014](#); [van Es  
186 et al., 2018](#); [Vo et al., 2017](#)). The 2D binning analysis was performed for all aforementioned  
187 simulation cases. The polar angle bins ranged from  $0^\circ$  to  $360^\circ$  with a constant bin width of

188 45°. The eccentricity bins ranged from 0 to 22 dva (for the simulation case involving a true  
189 effect) or from 0 to 20 dva (for all other simulation cases) with a constant bin width of 2 dva.

## 190 2.2. Post hoc binning using empirical repeat data

191 For the post hoc binning analysis on repeat data, we used publicly available pRF estimates  
192 from the HCP 7 T Retinotopy Dataset (Benson et al., 2018, 2020). These estimates stem  
193 from a split-half analysis where a 2D isotropic Gaussian with a subadditive exponent (Kay  
194 et al., 2013) was fit to fMRI time series from the first and second half of 6 pRF mapping runs.  
195 For each half, 6 estimates were obtained for each grayordinate (vertex; <https://wiki.humanconnectome.org/display/WBPublic/Workbench+Glossary>), that is, pRF polar angle,  
196 pRF eccentricity, pRF size, pRF gain, percentage of  $R^2$ , and mean signal intensity. The  
197 maximal eccentricity of the mapping area subtended 8 dva. For further details, see Benson  
198 et al. (2018).  
199

200 Following Benson et al. (2018), we analyzed complexes of visual areas across hemispheres  
201 for the 25<sup>th</sup> and 75<sup>th</sup> percentile participants of the  $R^2$  distribution using delineations from  
202 Wang et al.'s (2015) atlas. Benson et al. (2018) generated the  $R^2$  distribution by calculating  
203 the median  $R^2$  for each participant across grayordinates from both cortical hemispheres within  
204 all areas of Wang et al.'s (2015) atlas. For our purposes, we focused on the posterior complex  
205 (V1-V3) and the dorsal complex (V3A/B and IPS0–5), as those came with a larger number  
206 of available data points (which was, amongst other things, necessary to perform the 2D post  
207 hoc binning analysis and generate vector graphs).

208 To obtain  $x_0$  and  $y_0$  values, polar angle and eccentricity estimates were converted to  
209 Cartesian coordinates. The eccentricity,  $x_0$ , and  $y_0$  values of the first half were used as a  
210 Baseline condition and those of the second half as an Interest condition. Similar to the  
211 simulation-based analyses, binning was either based on the Interest or Baseline condition  
212 and bin-wise means were calculated. Moreover, binning was either performed without or  
213 with condition cross-thresholding. As for the latter case, we removed observations outside  
214 a certain eccentricity range ( $\geq 0$  and  $\leq 8$  dva) or below a certain  $R^2$  cut-off ( $\leq 2.2\%$ ) in  
215 the Baseline or Baseline and Interest condition from both conditions. The  $R^2$  cut-off was  
216 adopted from Benson et al. (2018).

217 We then performed a 1D binning analysis on eccentricity and a 2D binning analysis  
218 on  $x_0$  and  $y_0$  as we did for the simulated data. However, here, the eccentricity bins for  
219 the 2D analysis ranged from 0 to 18 dva with a constant bin width of 2 dva. All binning  
220 analyses and visualizations (including those on simulated data) were implemented in Matlab  
221 2016b (9.1; <https://uk.mathworks.com/>) using custom code (Data and code availability).  
222 The color scheme used for color-coding was an adapted version of the BrBG palette from  
223 ColorBrewer (2.0; Brewer et al., 2021) retrieved via R (3.5.3; R Core Team, 2018) and the  
224 package RColorBrewer (1.1-2; Neuwirth, 2014).

### 225 3. Results and discussion

#### 226 3.1. The many faces of regression towards the mean and other problems

227 To expose the regression artifact, we repeatedly perturbed the  $x_0$  and  $y_0$  values of an empirical  
228 visual field map with random Gaussian noise to generate a Baseline and Interest condition.  
229 We then converted the  $x_0$  and  $y_0$  values to eccentricity. Subsequently, we binned the eccen-  
230 tricity values of either condition according to eccentricity values in the Baseline condition  
231 using deciles and calculated bin-wise means. The bin-wise means from both conditions were  
232 plotted against one another along with individual observations per bin and marginal his-  
233 tograms reflecting the simulated distributions<sup>4</sup> (Figure 4, 1<sup>st</sup> column). Since there was no  
234 true difference between conditions, the bin-wise means should lie on the identity line. Con-  
235 trary to this prediction, they systematically diverged from the identity line. Strikingly, when  
236 using the Interest instead of the Baseline condition for binning, this systematic pattern of  
237 divergence flipped (Figure 4, 2<sup>nd</sup> column). This bidirectionality is a typical sign of regression  
238 towards the mean (Campbell and Kenny, 1999; Shanks, 2017) and due to circularity. This  
239 leads to asymmetric bins (see bin-wise ranges of observations for the Baseline and Interest  
240 condition, Figure 4, 1<sup>st</sup> and 2<sup>nd</sup> columns) and on average biases bin-wise noise components  
241 for the condition that was used for contrasting and binning (henceforth *circular* condition).  
242 On the contrary, for the other condition (henceforth *non-circular* condition), this is not the  
243 case.

244 The skew in average noise renders the bin-wise eccentricity means of the circular condition  
245 more extreme, especially for lower and higher decile bins. As a result, the bin-wise eccentricity  
246 means for the non-circular condition regress – by statistical necessity – to the overall mean<sup>5</sup>  
247 for this condition (red crosshair); that is, they are less extreme. This becomes clear when  
248 looking at the different ranges of bin-wise means for the circular and non-circular conditions  
249 (Figure 4, 1<sup>st</sup> and 2<sup>nd</sup> columns). If the Interest condition is then contrasted to the Baseline  
250 condition, a mean increase in eccentricity for lower deciles and a mean decrease for higher  
251 deciles or vice versa occurs, depending on whether the data are binned on the Baseline  
252 or Interest condition (Figure 4, 1<sup>st</sup> and 2<sup>nd</sup> columns). This artifact arises because we did  
253 not always use independent conditions for binning and contrasting; that is, conditions with  
254 independent noise components.

255 Apart from simple means (e.g., Binda et al., 2013; Carvalho et al., 2020; Haak et al., 2012;  
256 Yildirim et al., 2018), post hoc binning analyses have also been performed on change scores in  
257 previous pRF studies (e.g., Barton and Brewer, 2015; de Haas et al., 2014, 2020; Prabhakaran

---

<sup>4</sup>Note that apart from the visualizations provided here, it might be beneficial to additionally look at Galton squeeze diagrams to detect regression towards or away from the mean (see Figure 1; Campbell and Kenny, 1999; Galton, 1886; Shanks, 2017)

<sup>5</sup>Note that for skewed distributions (such as the gamma-like distribution here), the regression effect might be actually towards the mode and away from the mean of the overall distribution (Schwarz and Reike, 2018). If the location of the overall mode and mean are sufficiently close, our visualizations would be unable to distinguish these two cases.

## Simulated null effect

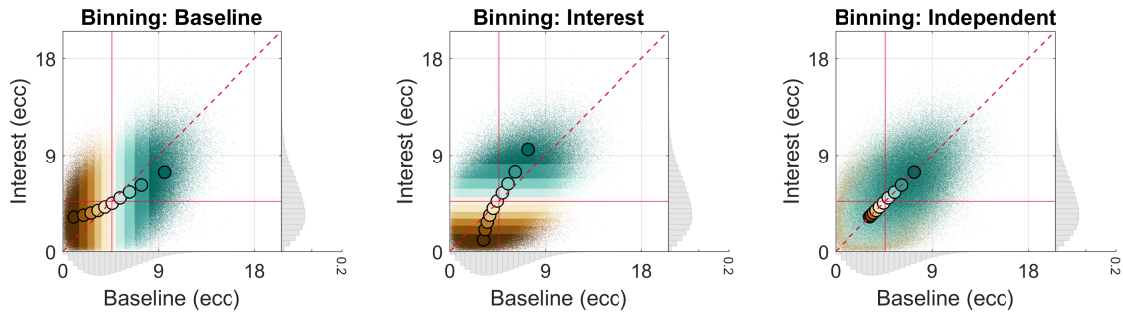

**Figure 4. Simulated 1D post hoc binning analysis on eccentricity | Null effect.** Bin-wise eccentricity values and means in the Interest and Baseline condition for a simulated null effect and different data binning scenarios. The eccentricity values in the Baseline and Interest condition were either binned according to eccentricity values in the Baseline (1<sup>st</sup> column), Interest (2<sup>nd</sup> column), or an Independent condition (equivalent to repeat data of the Baseline condition; 3<sup>rd</sup> column). The gray marginal histograms (bin width = 0.5 dva;  $y$ -axis: relative frequency) show the simulated eccentricity distributions for each condition, obtained by repeatedly disturbing the  $x_0$  and  $y_0$  values of an empirical visual field map with random Gaussian noise ( $SD = 2$  dva) and subsequently converting them to eccentricity values. Note that the range of the marginal  $y$ -axis is the same for all histograms. The red crosshair indicates the location of the overall mean for the Interest and Baseline condition. The red dashed line corresponds to the identity line. Dark brown colors correspond to lower and dark blue-green colors to higher decile bins. The smaller colorful dots represent individual data points and the larger colorful dots with the black outline bin-wise means. The maximal eccentricity of the stimulated visual field area subtended 8.5 dva. Dva = Degrees of visual angle. Ecc = Eccentricity.

258 et al., 2020; Tsouli et al., 2021). Here, the difference between the Interest and Baseline  
259 condition is typically plotted against the binning (i.e., circular) condition (Figure 5, A., 1<sup>st</sup>  
260 and 2<sup>nd</sup> columns). Consequently, the bin-wise means now regress to the overall mean of the  
261 change score distribution (see also Gignac and Zajenkowski, 2020; Holmes, 2009) and bin-wise  
262 noise components are neither unbiased for the change scores nor the binning conditions. This  
263 is because the noise components of the change scores are not independent of those in either  
264 binning condition. What is more, scatter plots of change scores disguise important aspects  
265 readily available with scatter plots of simple scores. Specifically, they prevent us from directly  
266 appreciating the larger bin-wise range of eccentricity means for the circular as compared to  
267 the non-circular condition (see explanations further above and compare Figure 5, A., and  
268 Figure 4, 1<sup>st</sup> and 2<sup>nd</sup> columns). This makes it difficult to spot the source of the problem  
269 graphically when only looking at a single plot. On the other hand, since both the  $x$ - and  
270  $y$ -axis feature the Baseline or Interest condition and either of these conditions are used for  
271 data binning, the act of double-dipping becomes much more obvious.

272 Critically, scattering change scores against one of the conditions involved in change score  
273 calculation also results in a biased visualization of individual change scores. This is because  
274 the noise components of the variables on the  $x$ - and  $y$ -axis are not independent, rendering

275 this sorting procedure circular. When plotting individual change scores against the Baseline  
276 condition, this results in a downwards sloping data cloud, suggesting an effect although there  
277 is none (Figure 5, A., 1<sup>st</sup> column). Why does this happen? Owing to noise, the change scores  
278 are more likely to be positive for lower Baseline eccentricities and negative for higher Baseline  
279 eccentricities (Figure 5, A., 1<sup>st</sup> column). When plotting individual change scores against the  
280 Interest condition, the reverse is true (Figure 5, A., 2<sup>nd</sup> column). This means visualizing or  
281 analyzing the data using such a circular sorting procedure is misleading irrespective of circular  
282 data binning (for more details on circular data sorting, see Holmes, 2009; Kriegeskorte et al.,  
283 2009).

284 The fact that circular sorting of change scores and circular data binning are separate  
285 issues can be further appreciated by imagining what happens when we plot the individual  
286 change scores against the Baseline condition, but bin on the Interest condition (instead of  
287 the Baseline condition as before). In this case, the individual change scores are sorted in a  
288 way (downwards sloping; just like in Figure 5, A., 1<sup>st</sup> column) that is opposite to the trend  
289 implied by the bin-wise means (upwards sloping).

290 How the regression artifact induced by circular data binning manifests can change when  
291 data are thresholded across conditions, that is, deleted in a pair- or list-wise fashion (Figure 5,  
292 B. and C., 1<sup>st</sup> and 2<sup>nd</sup> columns). In fact, in the event of condition cross-thresholding, noise  
293 components are reshaped and might thus not necessarily be unbiased on average even for the  
294 non-circular condition (Figure 5, B., 2<sup>nd</sup> column as well as Figure 5, C., 1<sup>st</sup> and 2<sup>nd</sup> columns).  
295 Condition cross-thresholding is common practice in the pRF literature where data are cleaned  
296 across conditions according to eccentricity, goodness-of-fit ( $R^2$ ), pRF size, missing data or  
297 other criteria from one or multiple conditions.

298 Here, we cross-thresholded the eccentricity values in the Interest and Baseline condition  
299 using the eccentricity values from the Baseline condition (Figure 5, B., 1<sup>st</sup> and 2<sup>nd</sup> columns)  
300 or both the Baseline and Interest condition (Figure 5, C., 1<sup>st</sup> and 2<sup>nd</sup> columns). This cross-  
301 thresholding procedure is circular whenever the noise components of the data used for cross-  
302 thresholding are not independent of the noise components of the data involved in contrasting.  
303 This is evidently true even without circular data binning. As such, the reason why the noise  
304 components in our cross-thresholding scenarios are sometimes biased even for the non-circular  
305 condition<sup>6</sup> (Figure 5, B., 2<sup>nd</sup> column as well as Figure 5, C., 1<sup>st</sup> and 2<sup>nd</sup> columns) is because  
306 we introduced another layer of circularity.

307 The fact that circular cross-thresholding and circular data binning are somewhat distinct  
308 but also highly similar issues can, for instance, be appreciated when comparing the overall  
309 instead of the bin-wise means. Without circular cross-thresholding, the overall mean in both

---

<sup>6</sup>For reasons of clarity and simplicity, we use the term 'circular condition' or 'non-circular condition' exclusively when referring to circular data binning. However, other circular selection procedures, such as circular data sorting or cleaning, might of course render a condition circular above and beyond circular data binning.

### A. Simulated null effect - Change score

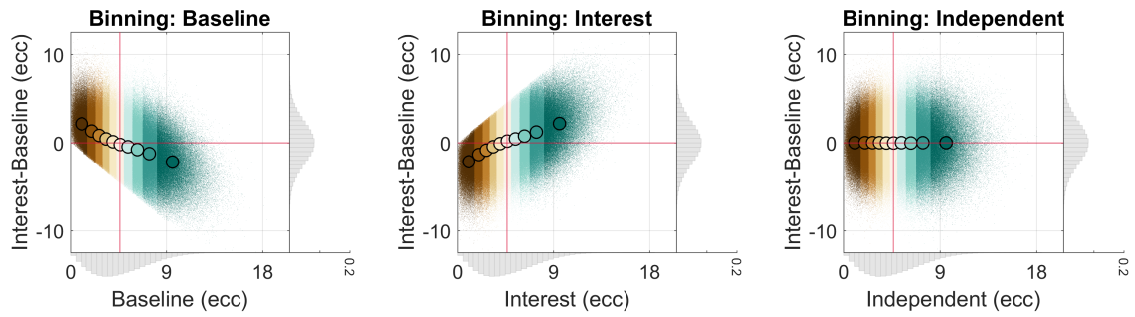

### B. Simulated null effect - Cross-thresholding (Baseline)

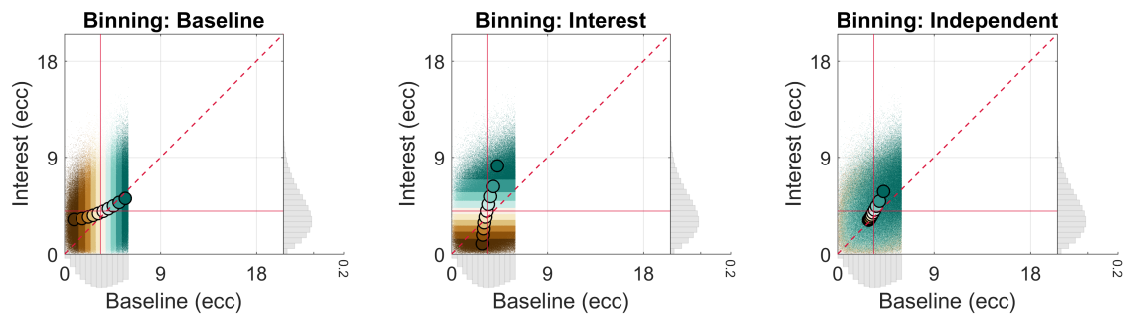

### C. Simulated null effect - Cross-thresholding (Baseline and Interest)

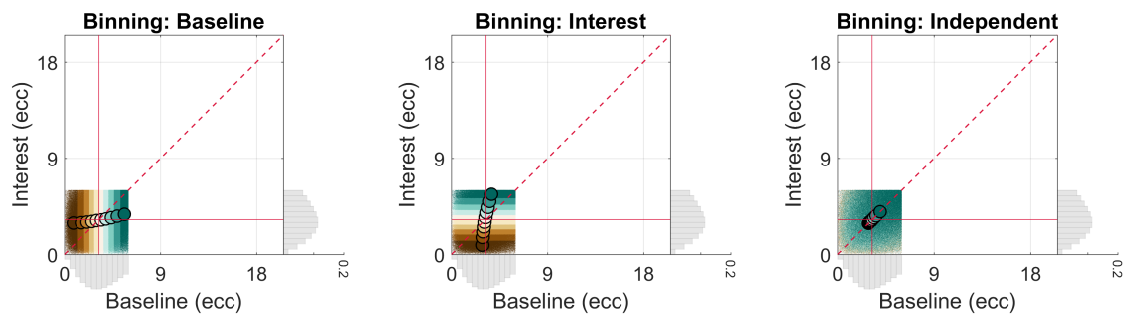

**Figure 5. Simulated 1D post hoc binning analysis on eccentricity | Null effect — Change score and cross-thresholding.** **A.** The same as in Figure 4, although here, the change score (Interest vs. Baseline) is plotted against the respective binning condition. **B.** The same as in Figure 4, although here, condition cross-thresholding was applied, i.e., simulated observations falling outside a certain eccentricity range ( $\geq 0$  and  $\leq 6$  dva) in the Baseline condition were removed from all conditions. **C.** The same as in B., although here, condition cross-thresholding was based on both the Baseline and Interest condition. (Condition) cross-thresholding = The pair-wise or list-wise deletion of observations across conditions.

### A. Simulated null effect - Eccentricity-dependent noise

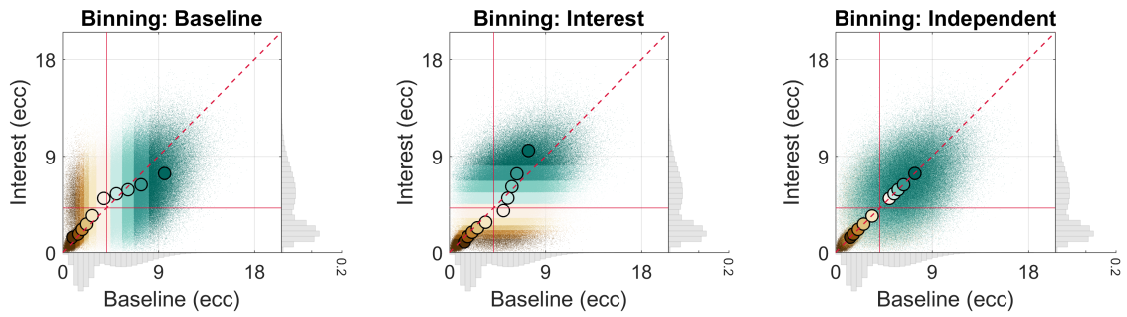

### B. Simulated true effect - Radial shift

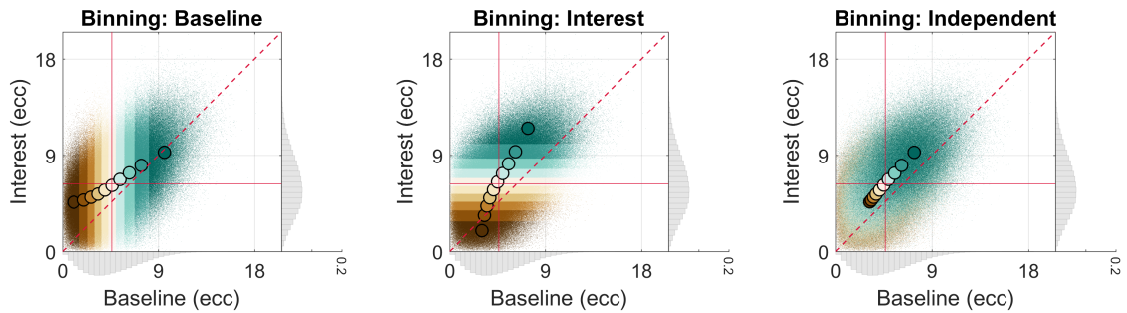

### C. Simulated null effect - Equidistant binning

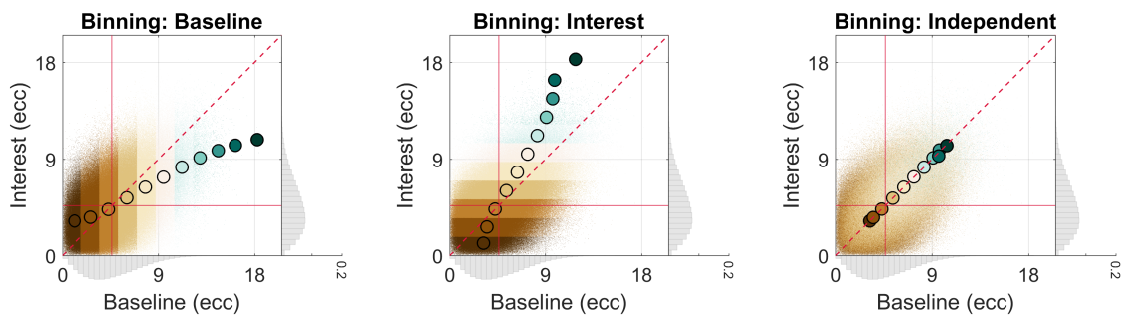

**Figure 6. Simulated 1D post hoc binning analysis on eccentricity | Null or true effect — Eccentricity-dependent noise, radial shift, and equidistant binning.** **A.** The same as in Figure 4, although here, original observations having smaller eccentricities ( $\geq 0$  and  $< 3$  dva) were disturbed by random Gaussian noise with a smaller standard deviation ( $SD = 0.25$  dva) and those having larger eccentricities ( $\geq 3$  dva) by random Gaussian noise with a larger standard deviation ( $SD = 2$  dva). **B.** The same as in Figure 4, although here, we simulated a true effect, that is, a radial increase in eccentricity of 2 dva in the Interest as compared to the Baseline condition. **C.** The same as in Figure 4, although here, equidistant binning was used. The equidistant bins ranged from an eccentricity of 0 dva to an eccentricity of 19.25 dva with a constant bin-width of 1.75 dva. Please note the different number of bins here relative to the other figure panels (11 vs 10, respectively).



310 the Baseline and Interest condition amounts to 4.66 dva (Figure 4, A., 1<sup>st</sup> and 2<sup>nd</sup> columns).  
311 With circular cross-thresholding based on the Baseline condition, the overall mean in the  
312 Baseline condition amounts to 3.40 dva, whereas it amounts to 3.97 dva in the Interest  
313 condition (Figure 5, B., 1<sup>st</sup> and 2<sup>nd</sup> columns). Here, the introduced bias for the Baseline  
314 condition can be appreciated by directly comparing the overall means in the Baseline and  
315 Interest condition. With circular cross-thresholding based on both the Baseline and Interest  
316 condition, the overall means in the Baseline and Interest condition amount to 3.24 dva and  
317 3.25 dva, respectively (Figure 5, C., 1<sup>st</sup> and 2<sup>nd</sup> columns). Here, the introduced bias for the  
318 Baseline and Interest condition can be appreciated by comparing the overall means in these  
319 conditions to the overall mean of an Independent condition (retest of the Baseline condition)  
320 that was cross-thresholded based on both the Baseline and Interest condition. This overall  
321 mean amounts to 3.66. We will return to the usefulness of such an Independent condition  
322 further below (3.2. Potential mitigation strategies). In any case, circular cross-thresholding  
323 biases the overall means as compared to when no such thresholding is performed.

324 Importantly, however, only circular cross-thresholding based on the Baseline condition  
325 results in artifactual differences between the overall means. Why is this? Given that the  
326 level of noise in the Interest and Baseline condition was equivalent (2.1. Post hoc binning  
327 using simulated data), circular cross-thresholding based on both the Baseline and Interest  
328 condition on average skewed the noise components for these conditions similarly, resulting  
329 in biased overall means, but a valid difference of around 0 between them. However, as for  
330 empirical data, the assumption of equivalent noise levels can probably only be safely made for  
331 repeat data (and even then, this needs to be justifiable). In any case, conceptually, circular  
332 cross-thresholding without data binning can be regarded as a single bin or region-of-interest  
333 analysis (Kriegeskorte et al., 2009), essentially constituting another subtype of a post hoc  
334 binning analysis.

335 The appearance of the regression artifact arising from circular data binning can further-  
336 more change when the level of noise depends on eccentricity – a property better known as  
337 *heteroskedasticity* (Figure 6, A., 1<sup>st</sup> and 2<sup>nd</sup> columns; see also Holmes, 2009). In fact, the  
338 case of eccentricity-dependent noise shows that the artifact can include some clear regres-  
339 sion *away* from the mean – a phenomenon referred to as *egression*<sup>7</sup> (Figure 6, A., 1<sup>st</sup> and  
340 2<sup>nd</sup> columns; see e.g., Campbell and Kenny, 1999; Schwarz and Reike, 2018). Eccentricity-  
341 dependent noise might arise from fitting errors that differ across visual space. This could  
342 be due to partial stimulation of pRFs (especially near the edge of the stimulated mapping  
343 area), higher variability in pRF position estimates for wider pRFs as well as fluctuations in  
344 the signal-to-noise ratio of brain responses from the central to the peripheral visual field or  
345 as a result of manipulating attention.

---

<sup>7</sup>Note that the regression was presumably towards the nearest modes of the simulated bimodal distribution (see marginal histograms in Figure 6, A., 1<sup>st</sup> and 2<sup>nd</sup> columns; Schwarz and Reike, 2018).

346 The regression artifact due to circular data binning also manifested when simulating a  
347 true effect (Figure 6, B., 1<sup>st</sup> and 2<sup>nd</sup> columns). The same was true for equidistant binning  
348 (Figure 6, C., 1<sup>st</sup> and 2<sup>nd</sup> columns), which is frequently applied in the pRF literature. How-  
349 ever, unlike decile binning (which we used further above), equidistant binning resulted in a  
350 lower number of observations for higher equidistant bins (due to the gamma-like eccentricity  
351 distribution; Figure 6, C., 1<sup>st</sup> and 2<sup>nd</sup> columns). Consequently, for higher equidistant  
352 bins, the skew in average noise for the circular condition was generally larger here (compare  
353 Figure 6, C., and Figure 4, 1<sup>st</sup> and 2<sup>nd</sup> columns). Similarly, for higher equidistant bins,  
354 noise components were not always unskewed on average for the non-circular condition (see  
355 Figure 6, C., 1<sup>st</sup> and 2<sup>nd</sup> columns, where the pattern of bin-wise means is not entirely mirror-  
356 symmetric). This is because for random noise to be unskewed on average, the number of  
357 observations needs to be sufficiently large.

358 Critically, both true effects and equidistant binning can substantially modify the ap-  
359 pearance of the regression artifact. Along with circular condition cross-thresholding and  
360 eccentricity-dependent noise, this teaches us an important lesson: the regression artifact can  
361 take pretty much *any* form<sup>8</sup>.

362 For all presented simulation cases (null effect, null effect with cross-thresholding or eccentricity-  
363 dependent noise, and true effect), the regression artifact likewise manifested for another kind  
364 of binning analysis, namely, when binning the  $x_0$  and  $y_0$  values according to both eccentricity  
365 and polar angle (i.e., 2D segments) and computing shift vectors (Figure 2 as well as Figure 7  
366 and Figure S2-S5, 1<sup>st</sup> row). Here, the bin-wise means regressed towards and away from the  
367 overall means of the  $x_0$  and  $y_0$  distribution. The calculation of shift vectors is not uncommon  
368 in pRF studies (e.g., Klein et al., 2014; van Es et al., 2018; Vo et al., 2017).

369 Notably, for empirical repeat data from the HCP (Benson et al., 2018, 2020), both kinds  
370 of binning analyses produced patterns consistent with the regression artifact (Figure S6-S13).  
371 This establishes its practical relevance. Moreover, some of us recently retracted an article  
372 on attention-induced differences in pRF position and size in V1-V3 (de Haas et al., 2014)  
373 because an in-house reanalysis suggested that circular post hoc binning along with circular  
374 condition cross-thresholding and heteroskedasticity yielded artifactual results in the form of  
375 regression from the mean (de Haas et al., 2020). In this case, the apparent significant effect  
376 was an increase in eccentricity and pRF size in the Interest vs Baseline condition (expressed  
377 as change scores) for eccentricity bins (based on the Baseline condition) in the middle of the  
378 tested range. Importantly, the inferential statistical analysis in this study (de Haas et al.,  
379 2014, 2020) was based on unbinned data, and thus the overall means. As such, the apparent  
380 significant effect was likely driven by or inflated due to circular cross-thresholding.

---

<sup>8</sup>Note that floor/ceiling effects (due to physiological and methodological constraints on the minimum and maximum observable value) and/or the calculation of absolute (raw) vs proportional (%) differences are further factors influencing the appearance of the regression artifact (de Haas et al., 2014, 2020; Holmes, 2009).

Simulated null effect

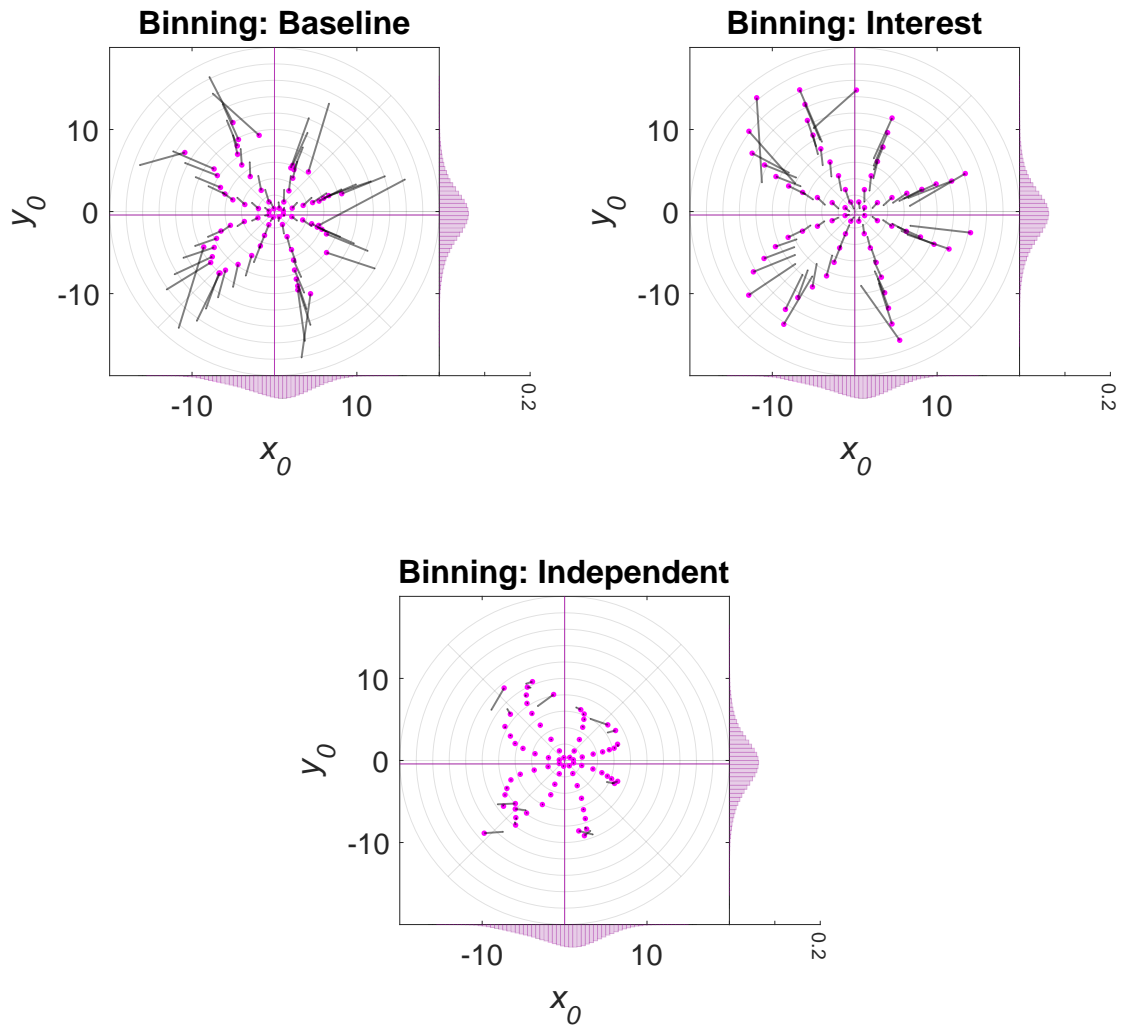

**Figure 7. Simulated 2D post hoc binning analysis on  $x_0$  and  $y_0$  | Null effect.** Bin-wise  $x_0$  and  $y_0$  means in the Interest and Baseline condition for a simulated null effect and different data binning scenarios. The  $x_0$  and  $y_0$  values in the Baseline and Interest condition were either binned according to eccentricity and polar angle values in the Baseline (1<sup>st</sup> column, 1<sup>st</sup> row), Interest (2<sup>nd</sup> column, 1<sup>st</sup> row), or an Independent condition (equivalent to repeat data of the Baseline condition; 2<sup>nd</sup> row). The marginal histograms (bin width = 0.5 dva;  $y$ -axis: relative frequency) show the simulated  $x_0$  and  $y_0$  distributions for each condition, obtained by repeatedly disturbing the  $x_0$  and  $y_0$  values of an empirical visual field map with random Gaussian noise ( $SD=2$  dva). Magenta histograms correspond to the Interest condition and gray histograms to the Baseline condition. Note that the range of the marginal  $y$ -axis is the same for all histograms. The large magenta dots (arrow tip) correspond to the means in the Interest condition and the endpoint of the gray line (arrow knock) to the means in the Baseline condition. The gray line itself (arrow shaft) depicts the shift from the Baseline to the Interest condition. The magenta crosshair indicates the location of the overall  $x_0$  and  $y_0$  means for the Interest condition and the gray crosshair the location of the overall means for the Baseline condition. Note that if there is no systematic difference between the Baseline and Interest condition, the histograms and crosshairs coincide (as is the case here). The light gray polar grid demarks the bin segments. Polar angle bins ranged from 0° to 360° with a constant bin width of 45° and eccentricity bins from 0 to 20 dva with a constant bin width of 2 dva. The maximal eccentricity of the stimulated visual field area subtended 8.5 dva. Dva = Degrees of visual angle.

381 The example of [de Haas et al. \(2014, 2020\)](#) illustrates that data visualizations and as-  
382 sociated inferential statistical analyses do not necessarily suffer from the same pitfalls. It is  
383 also possible that only one but not the other produces artifactual changes. This potential  
384 divergence adds another layer of complexity to the issues we discussed here.

385 Taken together, the heterogeneity in manifestation we exposed here makes it hard to spot  
386 the regression artifact by visual inspection alone and highlights its dependency on the type  
387 of analysis, additional circular selection practices as well as exact distributional properties of  
388 the data at hand (see [Campbell and Kenny, 1999](#); [Holmes, 2009](#); [Schwarz and Reike, 2018](#),  
389 for similar points). Importantly, circular data binning is only but one pitfall resulting in  
390 artifactual changes. Other pitfalls, such as circular sorting of change scores and circular  
391 cross-thresholding are equally problematic.

### 392 *3.2. Potential mitigation strategies*

393 How can we omit double-dipping and control for regression towards the mean? We could, for  
394 instance, use an Independent condition for binning (such as repeat data or odd or even runs  
395 for the Baseline condition; [Figure 4](#) and [Figure 5-6](#), A.-C., 3<sup>rd</sup> column as well as [Figure 7](#) and  
396 [Figure S2-S5](#), 2<sup>nd</sup> row) or an anatomical criterion ([Kriegeskorte et al., 2009](#)), such as cortical  
397 distance or anatomical atlases ([Benson et al., 2012, 2014](#)). This way, noise components should  
398 be unbiased on average in both the Baseline and Interest condition.

399 Unbiased bin-wise noise components are of course less likely for sparsely populated bins  
400 ([Figure 6](#), C., 3<sup>rd</sup> column as well as [Figure 7](#) and [Figure S2-S5](#), 2<sup>nd</sup> row), which can be  
401 captured by quantifying uncertainty. Critically, however, for scatter plots of change scores,  
402 bin-wise noise components are not unbiased for the Independent binning condition ([Figure 5](#),  
403 A., 3<sup>rd</sup> column). The reason for this is the same as before: non-independence of noise compo-  
404 nents. Thus, only the bin-wise change scores can be readily interpreted here. Moreover, given  
405 that cross-thresholding reshapes noise components, they might not be unbiased when bin-  
406 ning on an Independent condition ([Figure 5](#), B. and C., 3<sup>rd</sup> column as well as [Figure S2-S3](#),  
407 2<sup>nd</sup> row). The same can evidently also happen with an anatomical criterion if the Base-  
408 line and/or the Interest condition are subjected to cross-thresholding. Consequently, unless  
409 cross-thresholding can be omitted or demonstrated to be unbiased (see below for further  
410 considerations), an Independent condition might not be a safe option.

411 Of note, for the discussed cross-thresholding case where circular cross-thresholding was  
412 performed based on both the Interest and Baseline condition, binning on the Independent  
413 condition ensured that the bin-wise noise components for the Interest and Baseline condition  
414 are similarly biased ([Figure 5](#), C., 3<sup>rd</sup> column). As mentioned earlier, this is because cross-  
415 thresholding of this sort biases the noise components in the Baseline and Interest condition  
416 similarly ([3.1. The many faces of regression towards the mean and other problems](#)) and  
417 binning on an Independent condition introduces no further biases. Moreover, given that  
418 the noise components of both the Interest and Baseline condition were independent of those  
419 in the Independent condition, cross-thresholding did not bias the noise components in the

420 Independent condition. As such, although the simple bin-wise means in the Baseline and  
421 Interest condition are biased, the difference between those amounts to around 0 (Figure 5,  
422 C., 3<sup>rd</sup> column).

423 Apart from binning on an Independent condition, we could use analyses without binning  
424 that control for circularity and regression artifacts or effects could be evaluated against ap-  
425 propriate null distributions that take into account all statistical dependencies (e.g., Holmes,  
426 2009; Kriegeskorte et al., 2009). For instance, errors-in-variables models (e.g., Deming regres-  
427 sion) might be an option. Such models account for the noise in both the Baseline and Interest  
428 condition as well as for the fact that we often have no clear separation between independent  
429 and dependent variables in post hoc analyses of pRF data. However, as with any statistical  
430 approach, the underlying assumptions need to be checked carefully.

431 Just like circular data binning, circular sorting of change scores can be counteracted  
432 by plotting individual change scores against an Independent condition (Figure 5, A., 3<sup>rd</sup>  
433 column). Similarly, one way to deal with circular cross-thresholding might be to cross-  
434 threshold all data according to an Independent condition/the Independent binning condition.  
435 However, condition-specific systematic errors, such as artifacts and outliers, might survive  
436 such independent data cleaning. As such, the usage of robust estimators might be advisable.  
437 Future research is necessary to evaluate this point more comprehensively.

438 A combination of the discussed approaches might prove most fruitful. Regardless of the  
439 specific mitigation strategy, we believe that in light of the many layers of complexity in our  
440 analysis pipelines, we need to make it common practice to perform sanity checks using (null)  
441 simulations and empirical repeat data. This is because such sanity checks provide a means  
442 for us researchers to ensure the validity of our analysis procedures.

### 443 3.3. The bigger picture

444 Circular post hoc binning analyses come in many flavors (e.g., centroids, shift vectors, eccen-  
445 tricity differences,  $x_0$  and  $y_0$  differences, and 1D or 2D bins) and cannot be assumed to be  
446 restricted to pRF position estimates. For instance, partial stimulation of pRFs likely results  
447 in heteroskedasticity and positively correlated errors for pRF size and position. This would,  
448 for instance, bias bin-wise pRF size vs pRF position or pRF size vs pRF size comparisons  
449 where binning is based on non-independent eccentricity values. Likewise, fitting errors due  
450 to partial stimulation should be more pronounced whenever pRF size is larger, leading to  
451 stronger artifactual effects (for simulations using different levels of noise see Holmes, 2009).  
452 The same is to be expected based on a higher variability in pRF position estimates for wider  
453 pRFs. These factors might potentially explain why changes in pRF position and/or size  
454 have been reported to be tendentially larger in higher-level areas where pRFs are wider (e.g.,  
455 Barton and Brewer, 2015; de Haas et al., 2014, 2020; Klein et al., 2014; van Es et al., 2018).

456 Moreover, the distribution of errors likely depends on the toolbox that was used for  
457 fitting (Lerma-Usabiaga et al., 2020), making it hard to generalize across studies. And lastly,  
458 delineations of visual areas in post hoc binning analyses should ideally also be based upon

459 independent criteria as this is where selection starts. Importantly, the intricacies we just  
460 discussed do not only apply to circular data binning, but also circular sorting of change  
461 scores and circular condition cross-thresholding.

462 The application of circular data binning, circular sorting of change scores, and/or circular  
463 cross-thresholding in the pRF literature might have led to spurious claims about changes  
464 in pRFs (see [de Haas et al., 2014, 2020](#), for an example). Consequently, we encourage  
465 researchers who used such procedures to check for the severity of biases in their analyses by  
466 running adequate simulations and reanalyzing the original data wherever possible. Likewise,  
467 we urge them to take into account the issues discussed here when conducting future studies,  
468 reviewing manuscripts, and when teaching and mentoring.

### 469 *3.4. Limitations*

470 Our simulations were designed to encapsulate a given issue succinctly and cannot be inter-  
471 preted as reflecting the exact properties of empirical pRF data. For this, we would need to  
472 have a good understanding of the underlying noise components. Similarly, the level of random  
473 Gaussian noise we adopted for most simulations ( $SD = 2$  dva) might be more reminiscent  
474 of higher than lower visual areas (although this depends on many factors, such as mapping  
475 stimulus and magnetic field strength). For the present purposes, it appeared important to  
476 settle on a level allowing for clear exposition. Moreover, as alluded to further above ([1. In-](#)  
477 [troduction](#)), unless there is a perfect correlation between two variables (and thus no random  
478 noise), double-dipping and/or regression towards or away from the mean likely pose issues to  
479 post hoc analyses involving a range of selection procedures, such as data binning, cleaning,  
480 and sorting.

481 To fully parallel our simulations, the analyses of the HCP data would have benefited from  
482 binning on an Independent condition, that is, a second set of repeat data. PRF estimates  
483 for such an Independent condition are currently not publicly available ([Benson et al., 2018,](#)  
484 [2020](#)), leaving this sanity check for future research. Moreover, unlike our simulations, the  
485 condition cross-thresholding applied to the HCP data not only involved pRF position, but  
486 also goodness-of-fit ([2.1. Post hoc binning using simulated data](#) and [2.2. Post hoc binning](#)  
487 [using empirical repeat data](#)). This is because such multivariate data cleaning is frequently  
488 applied in pRF studies. It is challenging to simulate these more complex scenarios and thus  
489 best addressed in a separate article.

490 Some post hoc binning analyses in the pRF literature are conducted in a hemifield-specific  
491 fashion, whereas others mirror observations across hemifields or quadrants. Our analyses  
492 do not capture these specificities. However, there is no reason to believe that they would  
493 alleviate the expression of the regression artifact. The primary component that might change  
494 when applying such procedures is the location of the overall mean and the shape of the  
495 data distribution and thus how exactly the artifact manifests (for preliminary analyses, see  
496 [Stoll et al., 2022](#)). Of course, if data points are not mirrored based on an Independent  
497 condition but, for instance, the Baseline condition, data mirroring in combination with post

498 hoc binning and/or circular cross-thresholding might favor noise components in multiple ways.  
499 Importantly, circular data mirroring is also problematic for analyses that do not involve any  
500 circular data binning and/or circular cross-thresholding, as are other procedures, such as  
501 circular data weighting (Kriegeskorte et al., 2009).

## 502 **4. Conclusions**

503 Without doubt, circularity and regression towards the mean are thorny and omnipresent  
504 problems that can manifest subtly and diversely (e.g., Ball et al., 2020; Barnett et al., 2005;  
505 Campbell and Kenny, 1999; Eriksson and Häggström, 2014; Gignac and Zajenkowski, 2020;  
506 Holmes, 2009; Kilner, 2013; Kriegeskorte et al., 2009; Preacher et al., 2005; Shanks, 2017;  
507 Stigler, 1997; Vul et al., 2009). As such, we need to ensure that the validation of analysis  
508 procedures becomes part and parcel of the scientific process.

## 509 **Data and code availability**

510 Preprocessed data, custom code, and figures are available at [https://doi.org/10.17605/0](https://doi.org/10.17605/0SF.IO/WJADP)  
511 [SF.IO/WJADP](https://doi.org/10.17605/0SF.IO/WJADP).

## 512 **Acknowledgements**

513 This research was supported by European Research Council Starting Grants to DSS (WMOSPOTWU,  
514 310829) and BdH (INDIVISUAL, 852885). BdH was further supported by the Deutsche  
515 Forschungsgemeinschaft (222641018–SFB/TRR 135 TP C9). We thank three peer reviewers  
516 for providing constructive feedback.

## 517 **Declaration of competing interest**

518 The authors declare no conflict of interest.

## 519 **Supplementary methods**

### 520 **1. Retinotopic mapping experiment**

#### 521 *1.1. Participants*

522 All participants ( $N = 5$ , of which 2 were authors; 3 females; age range: 29-36 years) had  
523 corrected-to-normal visual acuity (obtained through corrective contact lenses) and gave writ-  
524 ten informed consent. As mentioned in the main text (2.1. [Post hoc binning using simulated](#)  
525 [data](#)), only the dataset of a single participant was used for simulation purposes. Experimental  
526 procedures were approved by the University College London Ethics Committee.

527 *1.2. Apparatus*

528 Functional and anatomical images were acquired at a field strength of 1.5 T on a Siemens  
529 Avanto magnetic resonance imaging (MRI) scanner. All stimuli were projected onto a screen  
530 (resolution:  $1920 \times 1080$  pixels; refresh rate: 60 Hz; background color: gray) at the back  
531 of the MRI scanner. Participants viewed the experiment through a head-mounted mirror.  
532 The viewing distance was approximately 67 cm. To ensure unobstructed view, we used a  
533 custom-made 32-channel head coil, where the front visor was demounted, leaving 30 effective  
534 channels. Eye movements of participant's left eye were recorded via an EyeLink 1000 MRI  
535 compatible eye tracker.

536 *1.3. Stimuli and procedure*

537 The mapping stimulus comprised a gray square field with a dynamic horizontal bar aperture  
538 (length of major axis: 17.15 dva; length of minor axis: 1.27 dva). The bar aperture was  
539 presented within the boundaries of a circular mapping area (diameter: 17.15 dva). It moved  
540 discretely and consecutively across the mapping area along cardinal ( $0/180^\circ$  and  $90/270^\circ$ ) and  
541 oblique axes ( $45/225^\circ$  and  $135/315^\circ$ ) and was superimposed onto a random dot kinematogram  
542 (RDK). The RDK comprised moving black dots (diameter: 0.13 dva) positioned within a  
543 square field (size:  $17.03 \times 17.03$  dva). If a dot left the square field, it was moved back by 1  
544 field width/height. The dots had a density of 6.89 dots/dva<sup>2</sup>, a lifetime of 36 frames, were  
545 repositioned randomly once they had died, and oscillated coherently along the major axis of  
546 the bar aperture according to a sine wave ( $A = 1.29$  dva,  $f = 1$  Hz,  $\omega = 6.28$  rad/s,  $\phi = 0$   
547 rad). The mapping stimulus and RDK were centered at the screen's midpoint.

548 A semi-transparent ( $\alpha = 50\%$ ) array of 5 vertical ovals was superimposed onto the map-  
549 ping stimulus. One of the ovals was centered at the screen's mid-point (length of major  
550 axis: 0.43 dva; length of minor axis: 0.28 dva) and the remaining ovals at an eccentricity  
551 of 4.29 dva (length of major axis: 0.86 dva; length of minor axis: 0.57 dva) and different  
552 polar angles ( $45^\circ$ ,  $135^\circ$ ,  $225^\circ$ , and  $315^\circ$ ). The ovals were presented as a rapid serial visual  
553 presentation (RSVP) task, where each trial started with 200 ms of oval presentation, followed  
554 by an interval of 600 ms without any ovals. Each oval's orientation ( $45^\circ$  left- or rightwards  
555 from vertical) and color (red, yellow, cyan, orange, brown, white, black, green, and blue)  
556 changed randomly in each trial with the exception that ovals of the same color were never  
557 presented simultaneously. Participants had to press a button whenever a rightwards oriented  
558 oval was presented in blue or green color. A black polar grid (line width: 0.02 dva) at low  
559 opacity ( $\alpha = 20\%$ ) with 12 radial lines (polar angles: 0 to  $330^\circ$  with a step size of  $30^\circ$ ) and  
560 18 circles (diameters: 0.95 to 51.42 dva with a step size of 2.97 dva) was superimposed onto  
561 the screen. The radial lines ran from the midpoint of the screen to the outermost circle.

562 The experiment comprised 4 attention conditions, in which participants were required to  
563 perform the RSVP task on different oval streams whilst ignoring other streams and the bar  
564 aperture. The condition used for simulation purposes was the *Center* condition, where par-  
565 ticipants performed the task on the central oval stream. This condition therefore resembled



566 a standard pRF mapping experiment where participants typically perform a task at fixation  
567 (e.g., [Alvarez et al., 2015](#); [Amano et al., 2009](#); [Benson et al., 2018](#)). Participants performed  
568 2 sessions each with 4 runs per condition on consecutive days. The order of conditions was  
569 pseudorandomized. Participants' eye position and pupil size were recorded at 60 Hz (down-  
570 sampled) throughout each run. One day prior to the first session, participants underwent 1  
571 mock run per condition inside the scanner to familiarize themselves with the task. Here, only  
572 behavioral data (and no functional or anatomical images) were collected.

573 Within each run, the bar aperture moved along each axis twice, so that the starting point  
574 covered all chosen polar angles. Specifically, the sequence of starting points in each run was:  
575  $90^\circ$ ,  $225^\circ$ ,  $180^\circ$ ,  $315^\circ$ ,  $270^\circ$ ,  $45^\circ$ ,  $0^\circ$ , and  $135^\circ$ . One bar sweep lasted 28 s (1 step/s). Consecutive  
576 bar apertures overlapped by 50%. After 4 bar sweeps, a blank interval of 28 s (without the bar  
577 apertures and RDK) was presented, during which participants had to refrain from doing the  
578 RSVP task. A brief tone cued the beginning and end of this interval. The position and lifetime  
579 of each dot in the RDK at the start of every 28-s-interval was randomized. Experimental  
580 procedures were implemented in Matlab 2014a (8.3; <https://uk.mathworks.com/>) using  
581 Psychtoolbox-3 (3.0.11; [Brainard, 1997](#); [Kleiner et al., 2007](#); [Pelli, 1997](#)).

#### 582 *1.4. MRI acquisition*

583 We collected anatomical images using a T1-weighted magnetization-prepared rapid acquisi-  
584 tion with gradient echo sequence (repetition time, TR = 2.73 s; echo time, TE = 3.57 ms;  
585 voxel size = 1 mm isotropic; flip angle =  $7^\circ$ ; field of view, FoV = 256 mm  $\times$  224 mm; matrix  
586 size = 256  $\times$  224; 176 sagittal slices) and functional images using a T2\*-weighted multiband  
587 2D echo-planar imaging sequence ([Breuer et al., 2005](#), TR = 1 s, TE = 55 ms, voxel size =  
588 2.3 mm isotropic, flip angle =  $75^\circ$ , FoV = 224 mm  $\times$  224 mm, no gap, matrix size: 96  $\times$   
589 96, acceleration = 4, 36 transverse slices). The slab for the functional images was aligned to  
590 be roughly parallel to the calcarine sulcus so that the posterior third of the cortex was well  
591 covered.

#### 592 *1.5. Preprocessing*

593 The initial 10 volumes of each run were discarded to allow for magnetization to reach equi-  
594 librium. Using SPM8 (6313; <https://www.fil.ion.ucl.ac.uk/spm/software/spm8/>),  
595 functional images were then bias-corrected, realigned, unwarped, coregistered to the anatom-  
596 ical image, and finally projected onto an anatomical surface model constructed in FreeSurfer  
597 (5.3.0; [Dale et al., 1999](#); [Fischl et al., 1999](#)). We generated vertex-wise fMRI time series per  
598 run by determining the functional voxel at half the distance between corresponding vertices  
599 in the pial surface and gray-white matter mesh. We then applied linear detrending to the  
600 time series of each run and  $z$ -standardized them. Surface projection, detrending, and  $z$ -  
601 standardization were performed in Matlab 2016b (9.1; <https://uk.mathworks.com/>) using  
602 SamSrf7 (7.05; [https://github.com/samsrf/samsrf/tree/3c7a0e25090e9097d5e2fd95](https://github.com/samsrf/samsrf/tree/3c7a0e25090e9097d5e2fd95696c00774acd26d6)  
603 [696c00774acd26d6](https://github.com/samsrf/samsrf/tree/3c7a0e25090e9097d5e2fd95696c00774acd26d6)).

604 *1.6. pRF estimation and delineations*

605 The vertex-wise preprocessed time series of the Center condition were averaged across the  
606 2 sessions. We then fit a 2D isotropic Gaussian pRF model with 5 free parameters ( $x_0$ ,  $y_0$ ,  
607  $\sigma$ ,  $\beta_0$ , and  $\beta_1$ ) to the vertex-wise average time series. To this end, we first predicted pRF  
608 responses by calculating the overlap between the pRF model and an indicator function of  
609 the bar aperture for each volume using a  $100 \times 100$  pixel matrix. Specifically, we used a 3D  
610 search space of possible values for  $\sigma$  ( $8.5 \text{ dva} \times 2^{-5.6:0.2:1}$ )<sup>9</sup>,  $x_0$ , and  $y_0$ , and generated pRF  
611 responses for each combination of these values. Values for  $x_0$  and  $y_0$  were first sampled from  
612 the polar coordinate system (polar angles: 0:10:350°; eccentricities:  $8.5 \text{ dva} \times 2^{-5:0.2:0.6}$ ) and  
613 then transformed to Cartesian coordinates. The pRF response per volume was expressed as  
614 mean percent overlap with the pRF model.

615 To obtain a predicted fMRI time series, we then convolved these pRF responses with  
616 a canonical hemodynamic response function (HRF) obtained based on data from a pre-  
617 vious study (de Haas et al., 2014, 2020). Next, we calculated the Pearson correlation  
618 between the predicted and the observed fMRI time series and retained the combination  
619 of parameter values showing the largest  $R^2$  with all  $R^2$ s  $\geq .01$ . These initial parameter  
620 estimates were then used as seeds for an optimization procedure aimed at further maxi-  
621 mizing the Pearson correlation between the observed and predicted fMRI time series us-  
622 ing a Nelder-Mead algorithm (Lagarias et al., 1998; Nelder and Mead, 1965). Lastly, we  
623 estimated  $\beta_0$  and  $\beta_1$  by performing linear regression between the observed and predicted  
624 time series. The final parameter maps were smoothed with a Gaussian kernel (FWHM  
625 = 3 mm) in spherical surface space. Vertices with a very poor  $R^2$  ( $< .01$ ) or artifacts  
626 ( $\sigma \leq 0$ ,  $\beta_1 \leq 0$  or  $\beta_1 > 3$ ) were removed prior to smoothing. V1 hemifield maps were  
627 manually delineated based on smooth polar angle maps using polar angle reversals (En-  
628 gel et al., 1997; Sereno et al., 1995; Wandell et al., 2007). These delineations were used  
629 as a mask to extract V1 vertices. Fitting, smoothing, and manual delineations were per-  
630 formed in Matlab 2016b (9.1; <https://uk.mathworks.com/>) using SamSrf7 (7.05; <https://github.com/samsrf/samsrf/tree/3c7a0e25090e9097d5e2fd95696c00774acd26d6>).  
631 <https://github.com/samsrf/samsrf/tree/3c7a0e25090e9097d5e2fd95696c00774acd26d6>).  
632 The canonical HRF we adopted is implemented in SamSrf7.

---

<sup>9</sup>Note that  $j:i:k$  stands for a regularly-spaced vector where  $i$  reflects the increment between  $j$  and  $k$ .

633 Supplementary figures

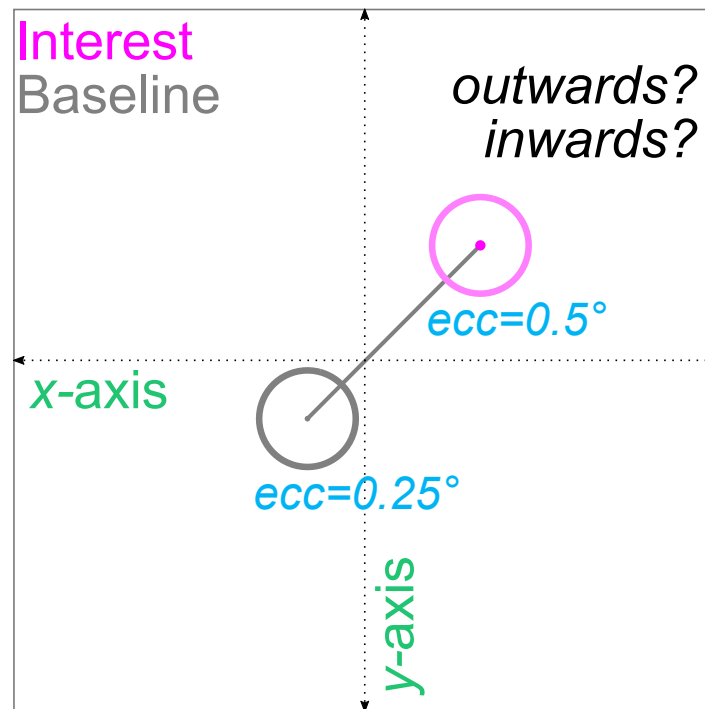

**Figure S1. Interpretation of changes in eccentricity.** The same as Figure 2, although here, the pRF shifts from one visual field quadrant to another in the Interest compared to the Baseline condition. This can happen due to noise or when visual field maps partially cover the ipsilateral hemifield. In such cases, an increase or decrease in eccentricity does not necessarily correspond to an outwards or inwards shift in the traditional sense. For instance, imagine that a pRF sits at  $x_0 = -0.18$  dva and  $y_0 = -0.18$  dva in the Baseline condition ( $\text{ecc} = 0.25$  dva) but at  $x_0 = 0.36$  dva and  $y_0 = 0.36$  dva in the Interest condition ( $\text{ecc} = 0.51$  dva). This would result in an increase in eccentricity, which might be interpreted as an outwards shift, although the pRF shifts effectively radially inwards until it reaches the origin and then outwards. We can likewise imagine that the pRF shifts horizontally to  $x_0 = 0.36$  dva and  $y_0 = -0.36$  dva in the Interest condition. Importantly, removing such shifts would bias noise components (see condition cross-thresholding in the main text and Figure 5, B. and C. as well as Figure S2-S3) and therefore, does not seem a valid option. Dva = Degrees of visual angle.

Simulated null effect - Cross-thresholding (Baseline)

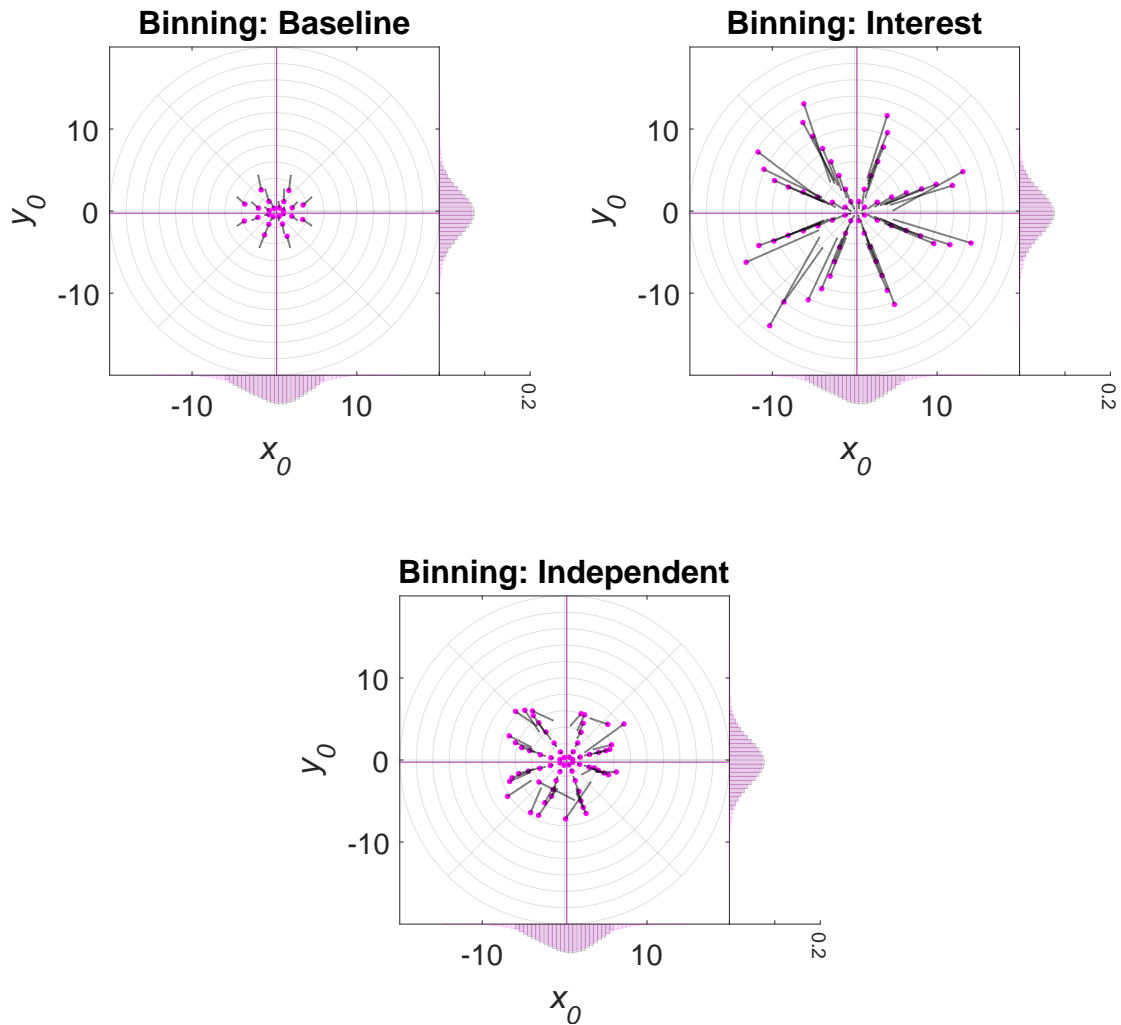

**Figure S2. Simulated 2D post hoc binning analysis on  $x_0$  and  $y_0$  | Null effect — Cross-thresholding (Baseline).** The same as in Figure 7, although here, condition cross-thresholding was applied, i.e., simulated observations falling outside a certain eccentricity range ( $\geq 0$  and  $\leq 6$  dva) in the Baseline condition were removed from all conditions. (Condition) cross-thresholding = The pair-wise or list-wise deletion of observations across conditions.

Simulated null effect - Cross-thresholding (Baseline and Interest)

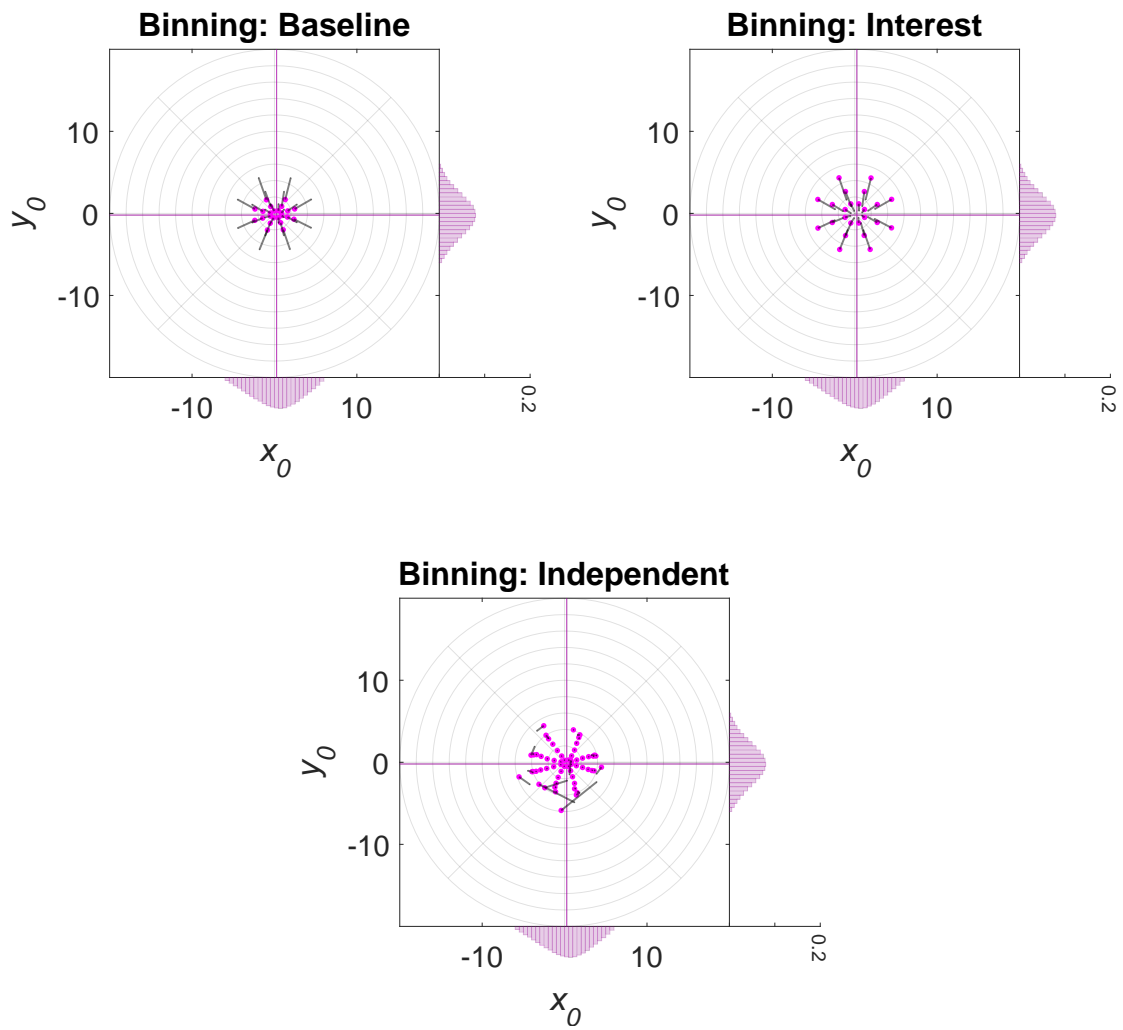

*Figure S3. Simulated 2D post hoc binning analysis on  $x_0$  and  $y_0$  | Null effect — Cross-thresholding (Baseline and Interest).* The same as in [Figure S2](#), although here, condition cross-thresholding was based on both the Baseline and Interest condition.

Simulated null effect - Eccentricity-dependent noise

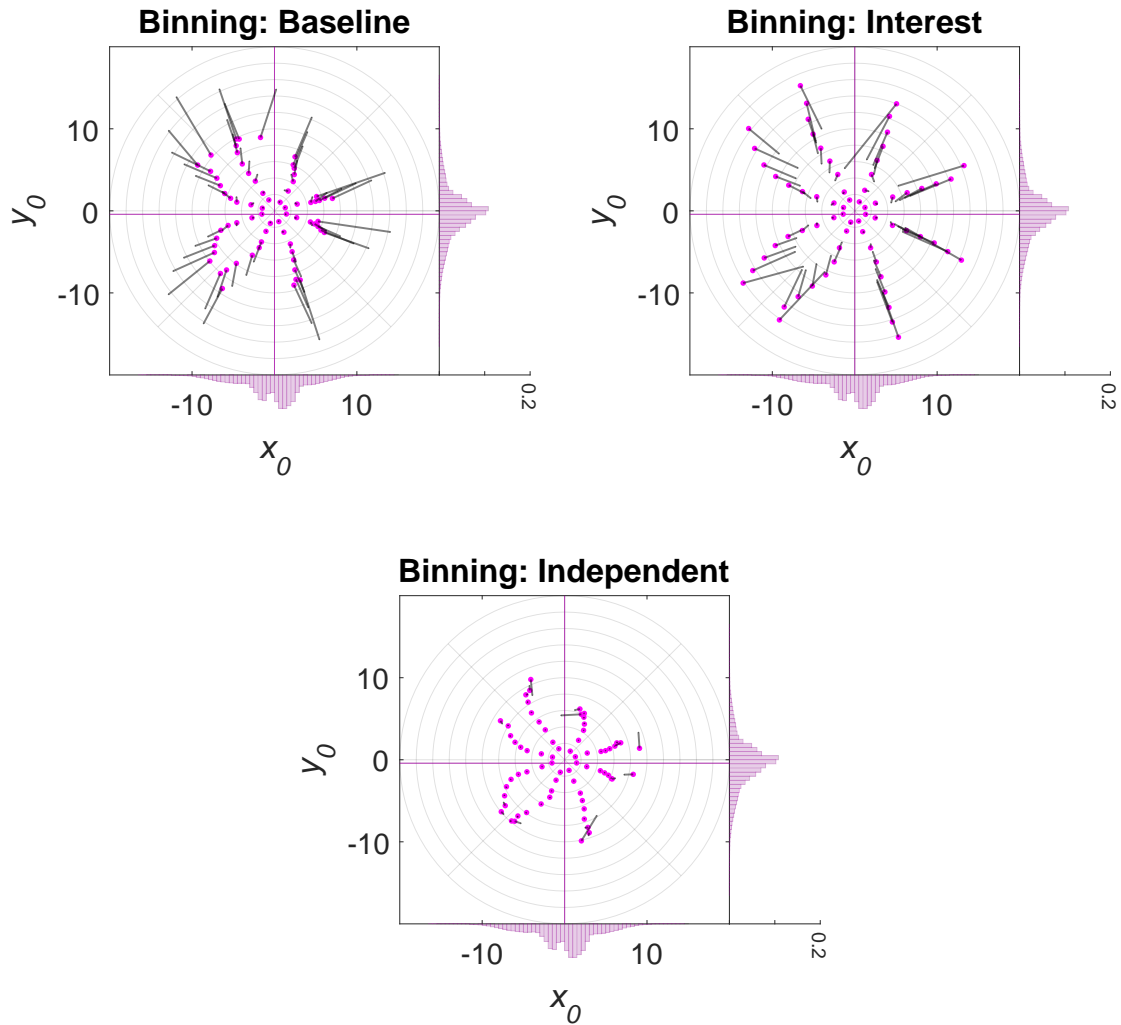

**Figure S4. Simulated 2D post hoc binning analysis on  $x_0$  and  $y_0$  | Null effect — Eccentricity-dependent noise.** The same as in Figure 7, although here, original observations having smaller eccentricities ( $\geq 0$  and  $< 3$  dva) were disturbed by random Gaussian noise with a smaller standard deviation ( $SD = 0.25$  dva) and those having larger eccentricities ( $\geq 3$  dva) by random Gaussian noise with a larger standard deviation ( $SD = 2$  dva).

Simulated true effect - Radial shift

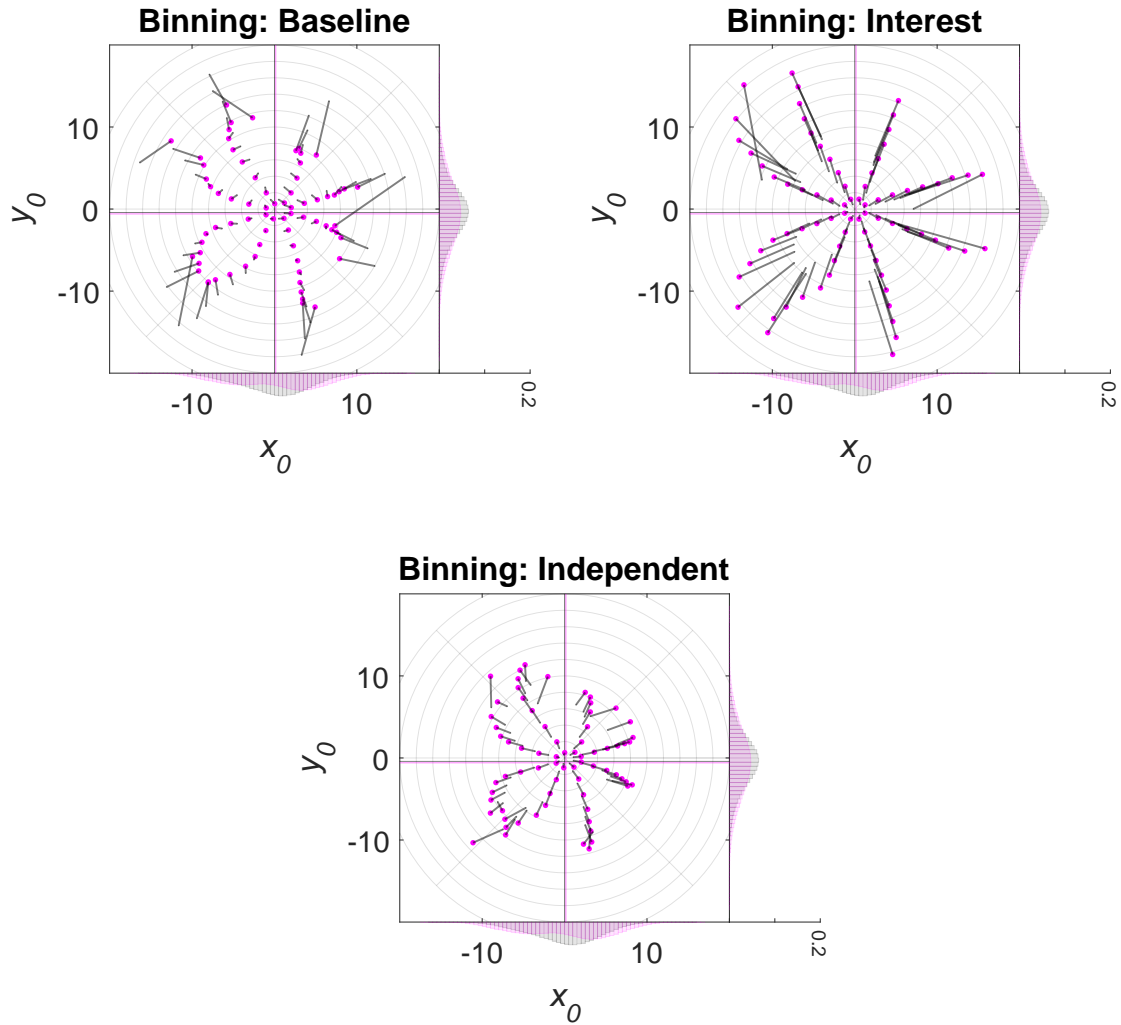

**Figure S5. Simulated 2D post hoc binning analysis on  $x_0$  and  $y_0$  | True effect — Radial shift.** The same as in [Figure 7](#), although here, we simulated a true effect, that is, a radial increase in eccentricity of 2 dva in the Interest as compared to the Baseline condition. Note that the eccentricity bins ranged from 0 to 22 dva here (instead of 0 to 20 dva).

A. Empirical repeat data | 25<sup>th</sup> %ile | Dorsal

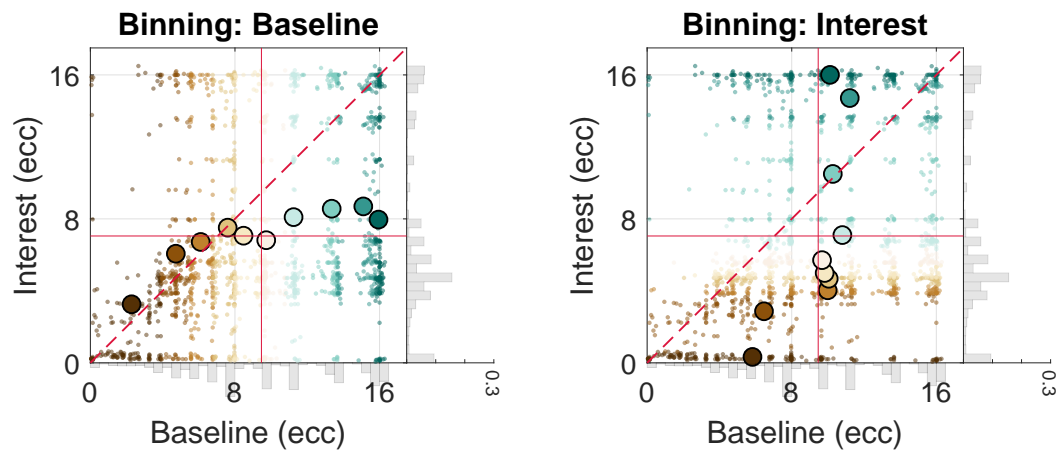

B. Empirical repeat data | 25<sup>th</sup> %ile | Dorsal – Cross-thresholding (Baseline)

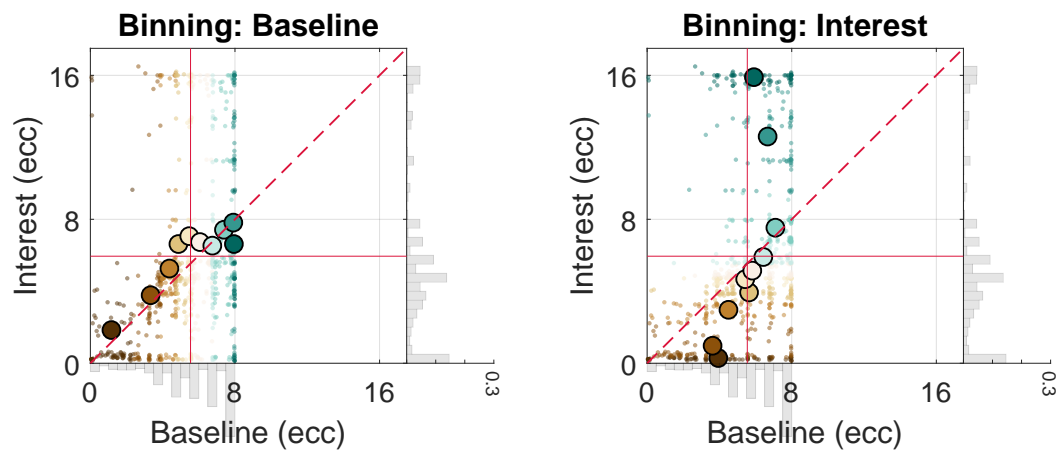

C. Empirical repeat data | 25<sup>th</sup> %ile | Dorsal – Cross-thresholding (Baseline and Interest)

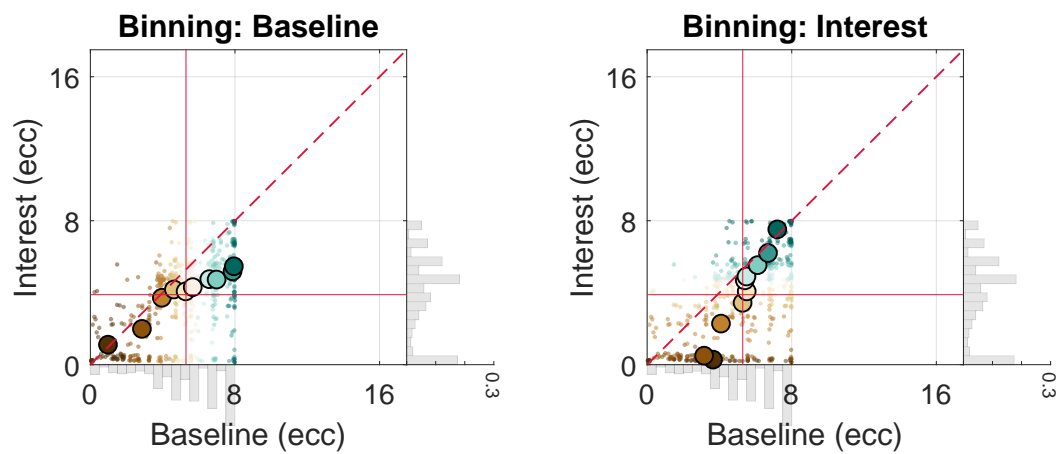

Figure S6. Caption on next page.



**Figure S6. Empirical 1D post hoc binning analysis on eccentricity | Repeat data | 25<sup>th</sup> %ile participant | Dorsal — Without and with cross-thresholding.** Bin-wise eccentricity values and means in the Interest and Baseline condition for repeat data from the HCP belonging to the 25<sup>th</sup> %ile participant of the median  $R^2$  distribution and different data binning scenarios. **A.** Data from the dorsal complex (V3A/B and IPS0-5) without condition cross-thresholding. **B.** Same as A., but with condition cross-thresholding. To this end, eccentricity values falling outside a certain eccentricity range ( $\geq 0$  and  $\leq 8$  dva) and below a certain  $R^2$  cut-off ( $\leq 2.2\%$ ) in the Baseline condition were removed from both conditions. **C.** Same as B., although here, condition cross-thresholding was based on both the Baseline and Interest condition. The eccentricity values in the Baseline and Interest condition were either binned according to eccentricity values in the Baseline (1<sup>st</sup> column in A.-C.) or Interest (2<sup>nd</sup> column in A.-C.) condition. The gray marginal histograms (bin width = 0.5 dva;  $y$ -axis: relative frequency) show the eccentricity distributions for each condition. Note that the range of the marginal  $y$ -axis is the same for all histograms. The red crosshair indicates the location of the overall mean for the Interest and Baseline condition. The red dashed line corresponds to the identity line. Dark brown colors correspond to lower and dark blue-green colors to higher decile bins. The smaller colorful dots represent individual data points and the larger colorful dots with the black outline bin-wise means. The maximal eccentricity of the stimulated visual field area subtended 8 dva. HCP = Human Connectome Project. Dva = Degrees of visual angle. Ecc = Eccentricity. %ile = Percentile. (Condition) cross-thresholding = The pair-wise or list-wise deletion of observations across conditions.

A. Empirical repeat data | 25<sup>th</sup> %ile | Posterior

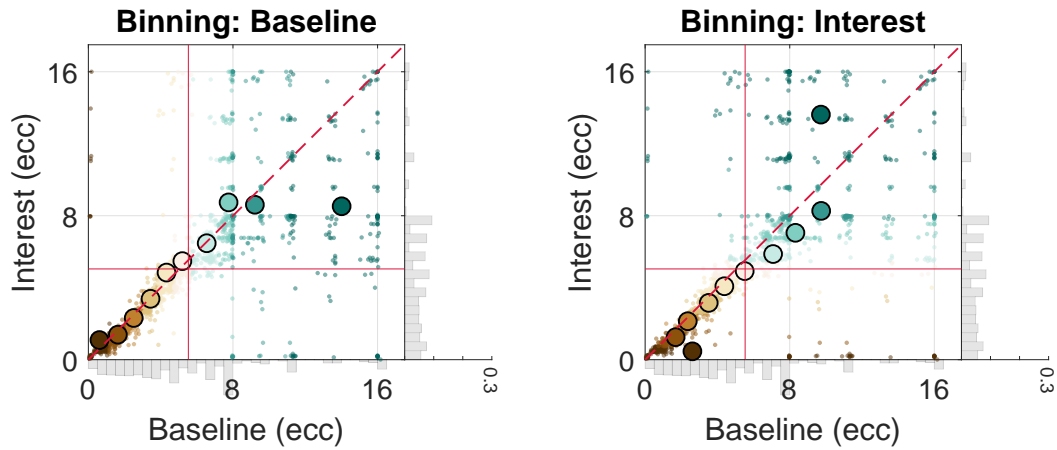

B. Empirical repeat data | 25<sup>th</sup> %ile | Posterior – Cross-thresholding (Baseline)

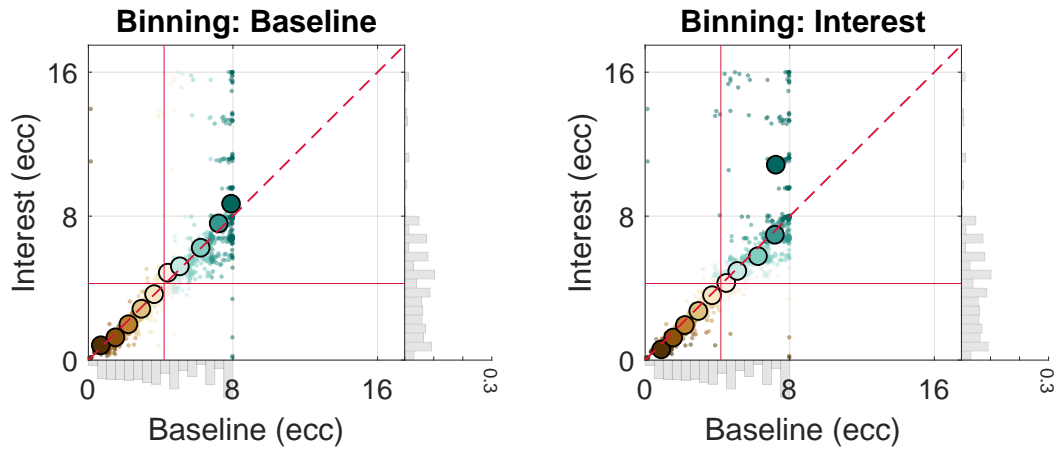

C. Empirical repeat data | 25<sup>th</sup> %ile | Posterior – Cross-thresholding (Baseline and Interest)

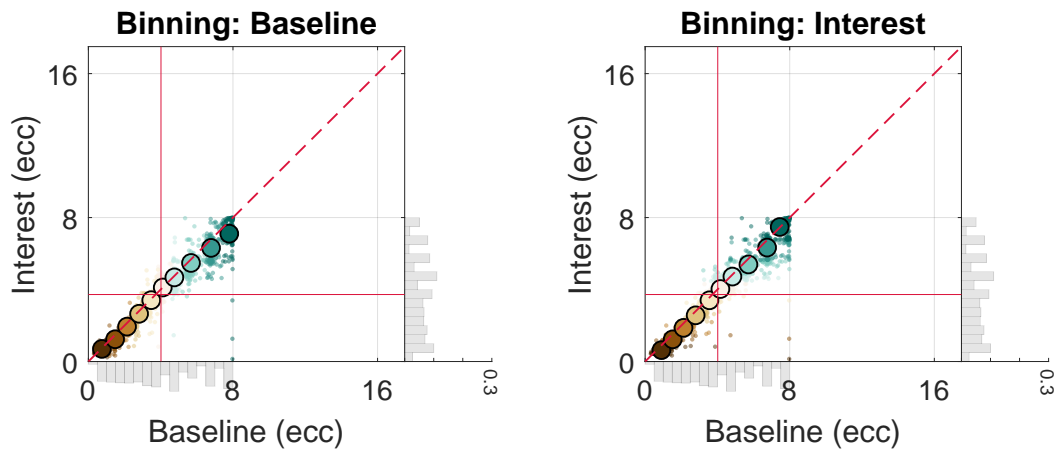

Figure S7. Empirical 1D post hoc binning analysis on eccentricity | Repeat data | 25<sup>th</sup> %ile participant | Posterior — Without and with cross-thresholding. The same as in Figure S6, although here, we used data from the posterior complex (V1-V3).

A. Empirical repeat data | 75<sup>th</sup> %ile | Dorsal

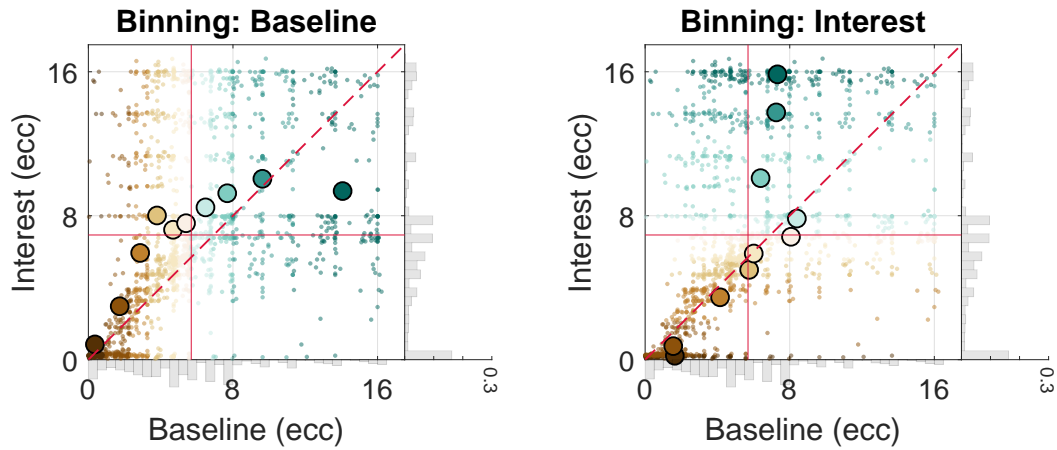

B. Empirical repeat data | 75<sup>th</sup> %ile | Dorsal – Cross-thresholding (Baseline)

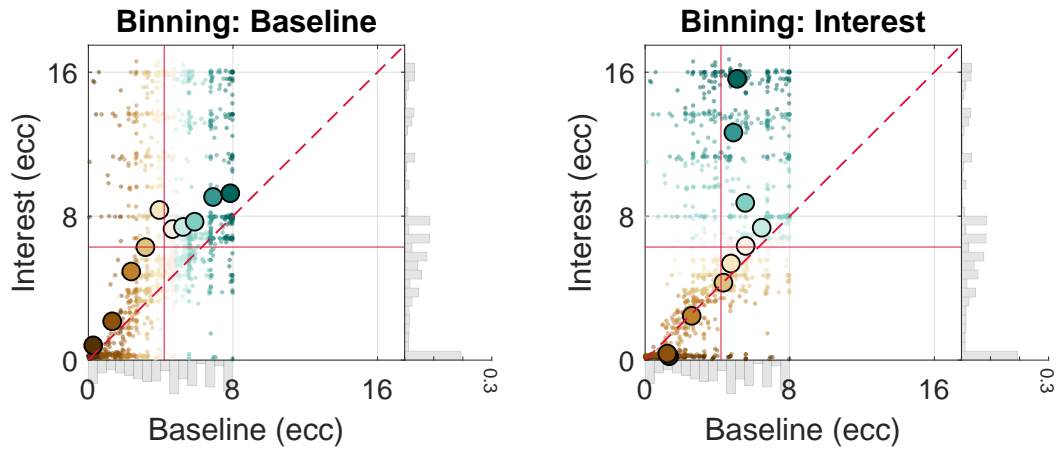

C. Empirical repeat data | 75<sup>th</sup> %ile | Dorsal – Cross-thresholding (Baseline and Interest)

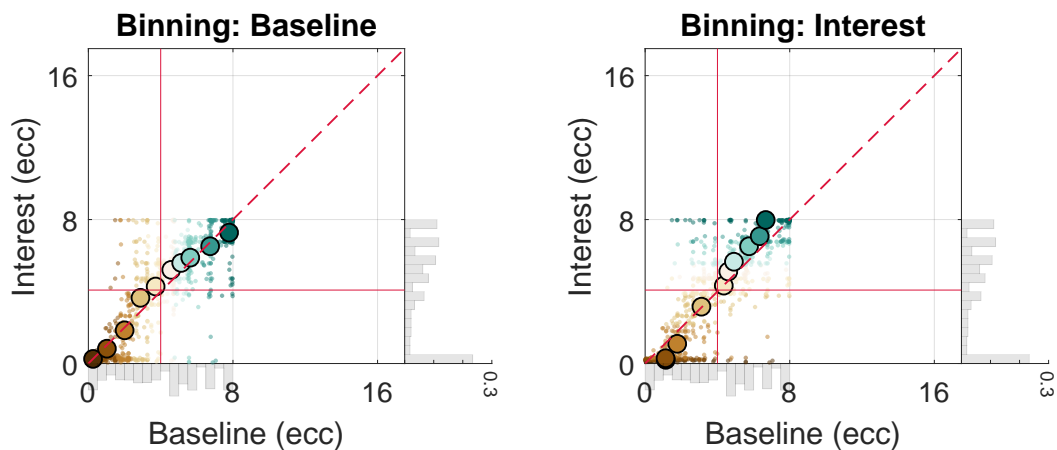

Figure S8. Empirical 1D post hoc binning analysis on eccentricity | Repeat data | 75<sup>th</sup> %ile participant | Dorsal — Without and with cross-thresholding. The same as in Figure S6, although here, we used the 75<sup>th</sup> %ile participant of the median  $R^2$  distribution.

A. Empirical repeat data | 75<sup>th</sup> %ile | Posterior

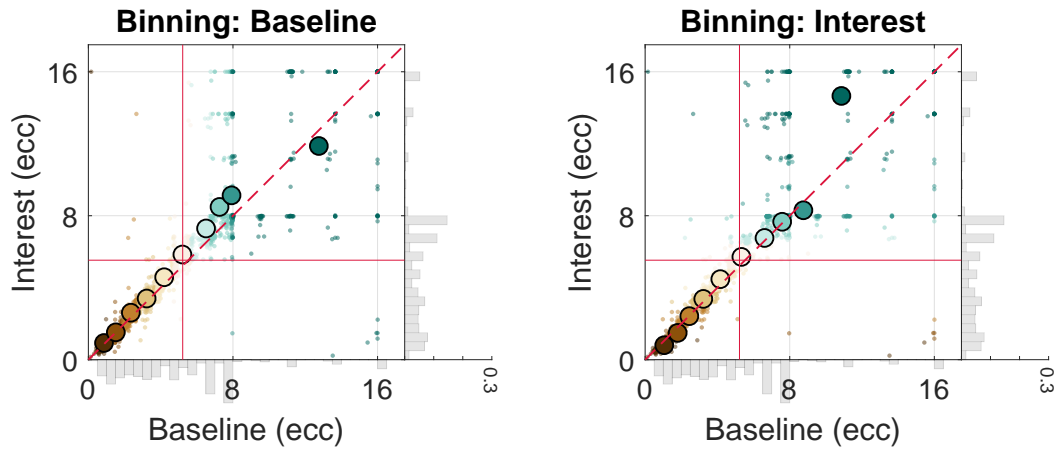

B. Empirical repeat data | 75<sup>th</sup> %ile | Posterior – Cross-thresholding (Baseline)

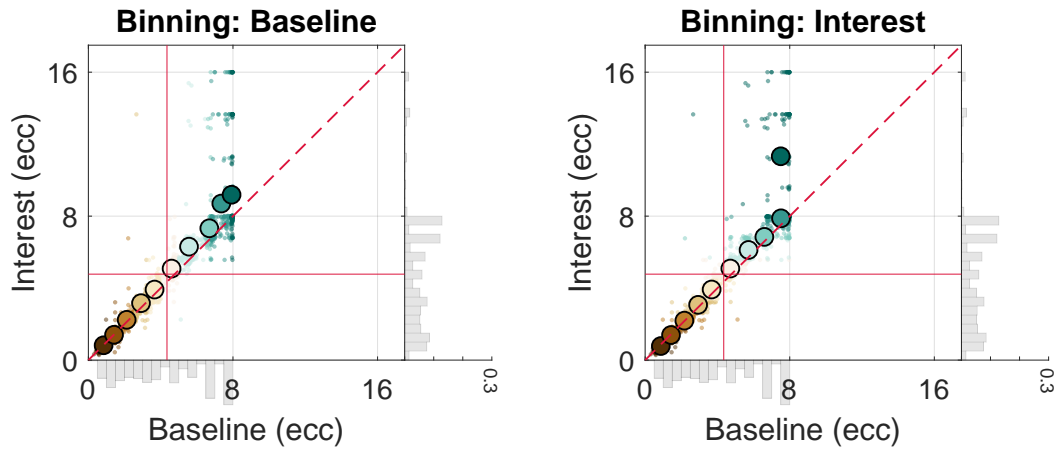

C. Empirical repeat data | 75<sup>th</sup> %ile | Posterior – Cross-thresholding (Baseline and Interest)

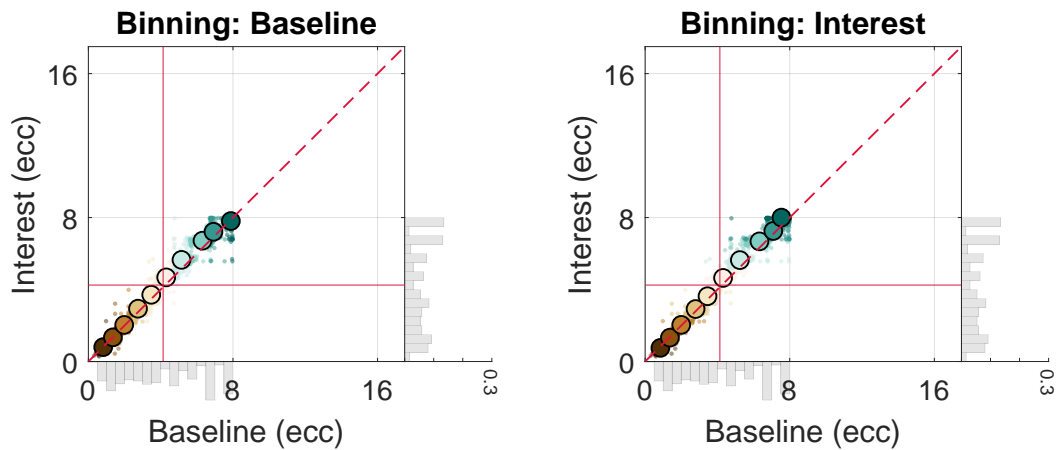

Figure S9. Empirical 1D post hoc binning analysis on eccentricity | Repeat data | 75<sup>th</sup> %ile participant | Posterior — Without and with cross-thresholding. The same as in Figure S7, although here, we used the 75<sup>th</sup> %ile participant of the median  $R^2$  distribution.

A. Empirical repeat data | 25<sup>th</sup> %ile | Dorsal

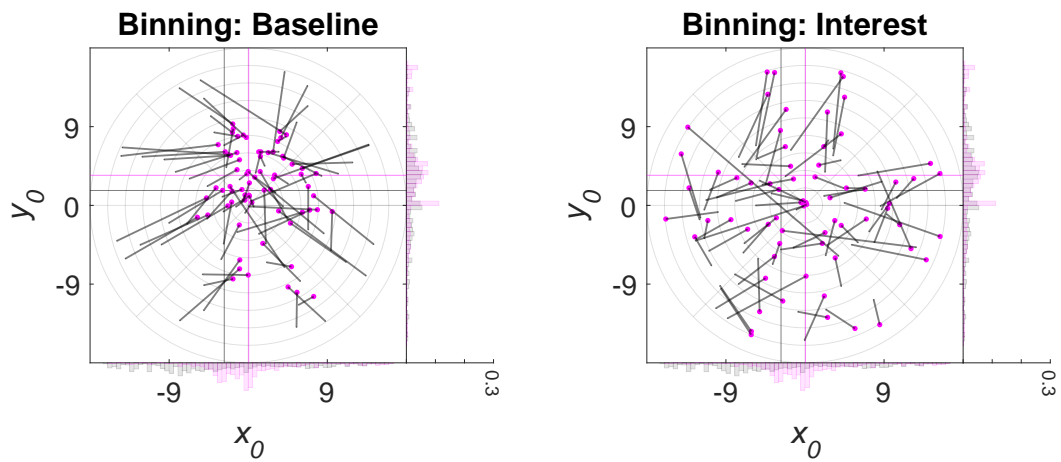

B. Empirical repeat data | 25<sup>th</sup> %ile | Dorsal – Cross-thresholding (Baseline)

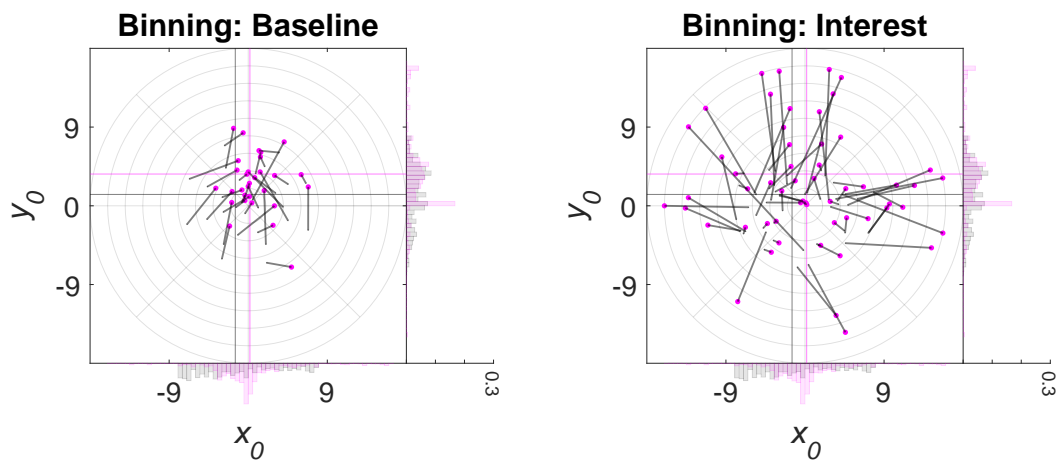

C. Empirical repeat data | 25<sup>th</sup> %ile | Dorsal – Cross-thresholding (Baseline and Interest)

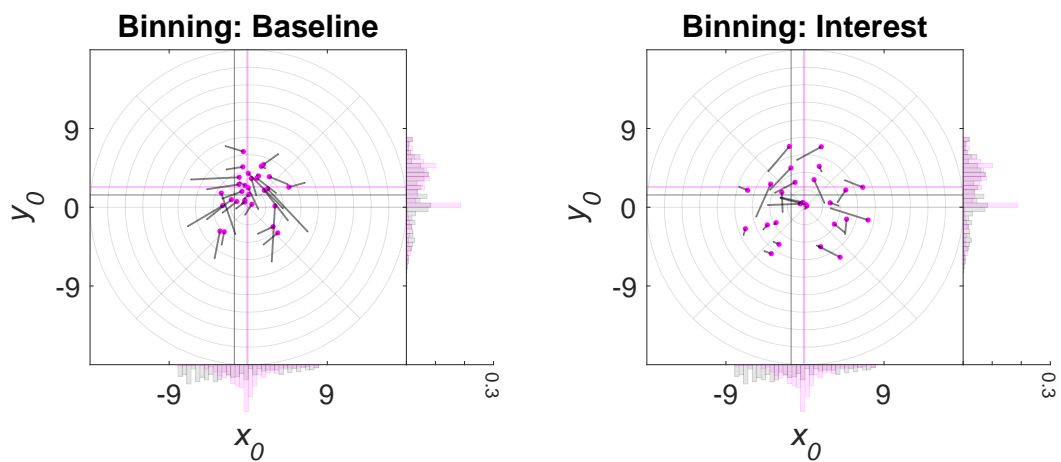

Figure S10. Caption on next page.

**Figure S10. Empirical 2D post hoc binning analysis on  $x_0$  and  $y_0$  | Repeat data | 25<sup>th</sup> %ile participant | Dorsal — Without and with cross-thresholding.** Bin-wise  $x_0$  and  $y_0$  means in the Interest and Baseline condition for repeat data from the HCP belonging to the 25<sup>th</sup> percentile participant of the median  $R^2$  distribution and different data binning scenarios. **A.** Data from the dorsal complex (V3A/B and IPS0–5) without condition cross-thresholding. **B.** Same as A., but with condition cross-thresholding. To this end, eccentricity values falling outside a certain eccentricity range ( $\geq 0$  and  $\leq 8$  dva) and below a certain  $R^2$  cut-off ( $\leq 2.2\%$ ) in the Baseline condition were removed from both conditions. **C.** Same as B., although here, condition cross-thresholding was based on both the Baseline and Interest condition. The  $x_0$  and  $y_0$  values in the Baseline and Interest condition were either binned according to eccentricity and polar angle values in the Baseline (1<sup>st</sup> column in A.-C.) or Interest (2<sup>nd</sup> column in A.-C.) condition. The marginal histograms (bin width = 0.5 dva;  $y$ -axis: relative frequency) show the  $x_0$  and  $y_0$  distributions for each condition. Magenta histograms correspond to the Interest condition and gray histograms to the Baseline condition. Note that the range of the marginal  $y$ -axis is the same for all histograms. The large magenta dots (arrow tip) correspond to the means in the Interest condition and the endpoint of the gray line (arrow knock) to the mean in the Baseline condition. The gray line itself (arrow shaft) depicts the shift from the Baseline to the Interest condition. The magenta crosshair indicates the location of the overall  $x_0$  and  $y_0$  means for the Interest condition and the gray crosshair the location of the overall means for the Baseline condition. Note that for subtle differences between the Baseline and Interest condition, the histograms and crosshairs almost coincide (see [Figure S11](#) and [Figure S13](#)). The light gray polar grid demarks the bin segments. Polar angle bins ranged from 0° to 360° with a constant bin width of 45° and eccentricity bins from 0 to 18 dva with a constant bin width of 2 dva. The maximal eccentricity of the stimulated visual field area subtended 8 dva. HCP = Human Connectome Project. Dva = Degrees of visual angle. %ile = Percentile. (Condition) cross-thresholding = The pair-wise or list-wise deletion of observations across conditions.

A. Empirical repeat data | 25<sup>th</sup> %ile | Posterior

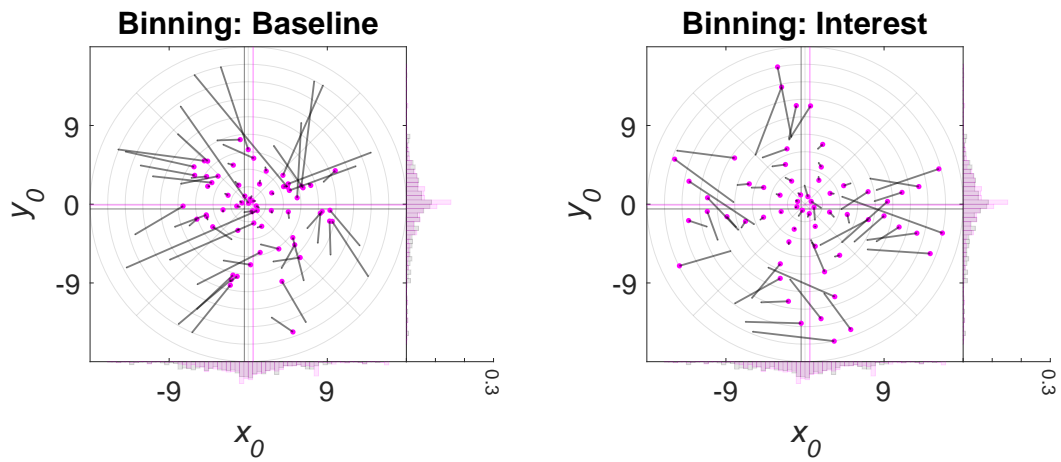

B. Empirical repeat data | 25<sup>th</sup> %ile | Posterior – Cross-thresholding (Baseline)

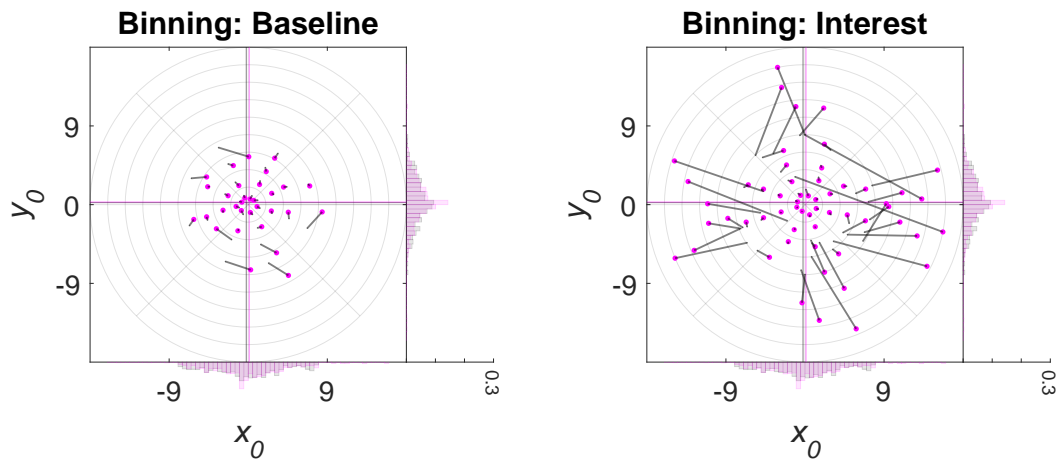

C. Empirical repeat data | 25<sup>th</sup> %ile | Posterior – Cross-thresholding (Baseline and Interest)

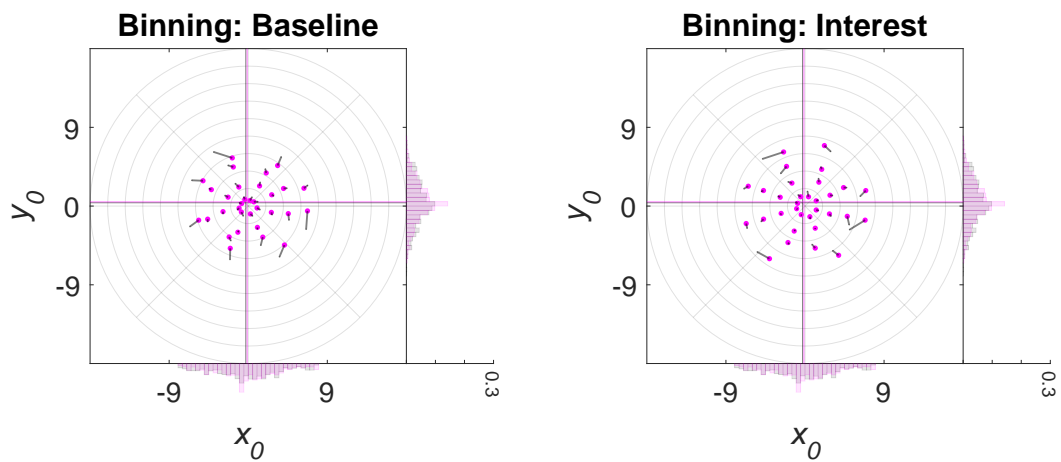

**Figure S11. Empirical 2D post hoc binning analysis on  $x_0$  and  $y_0$  | Repeat data | 25<sup>th</sup> %ile participant | Posterior — Without and with cross-thresholding.** The same as in [Figure S10](#), although here, we used data from the posterior complex (V1-V3).

A. Empirical repeat data | 75<sup>th</sup> %ile | Dorsal

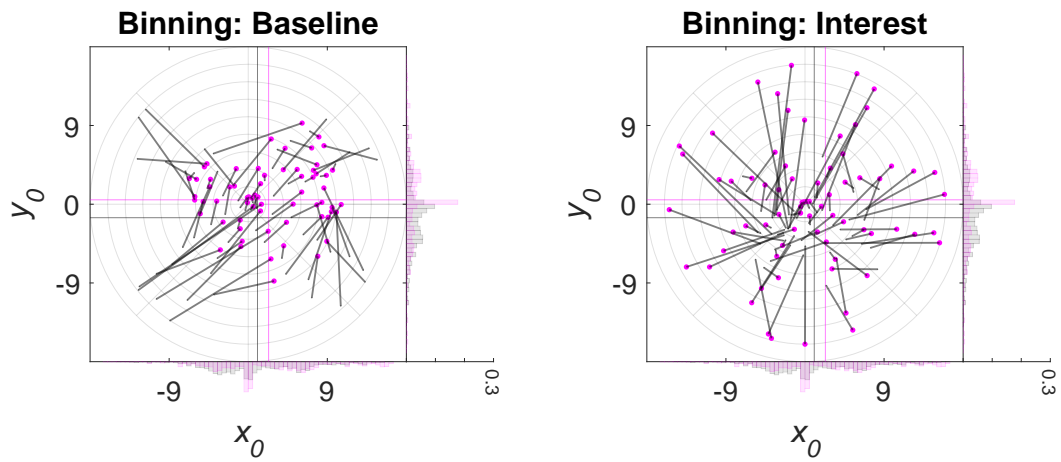

B. Empirical repeat data | 75<sup>th</sup> %ile | Dorsal – Cross-thresholding (Baseline)

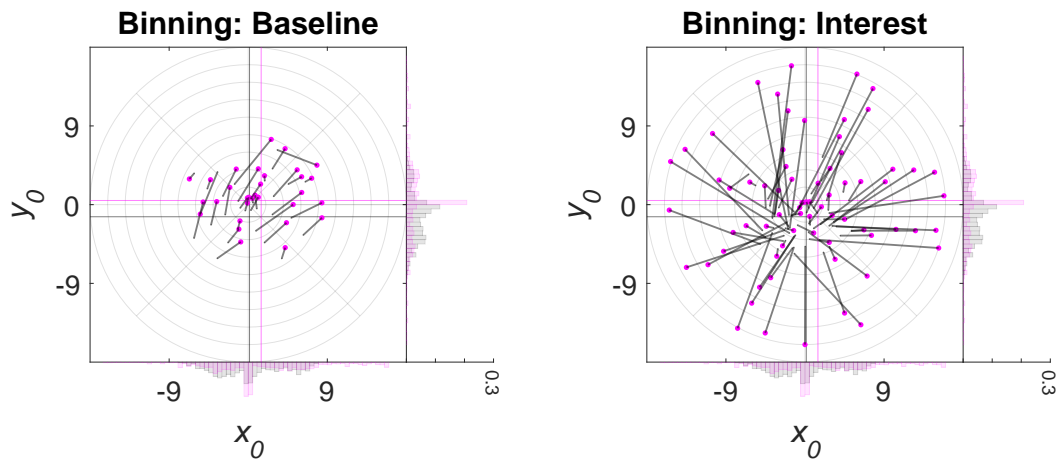

C. Empirical repeat data | 75<sup>th</sup> %ile | Dorsal – Cross-thresholding (Baseline and Interest)

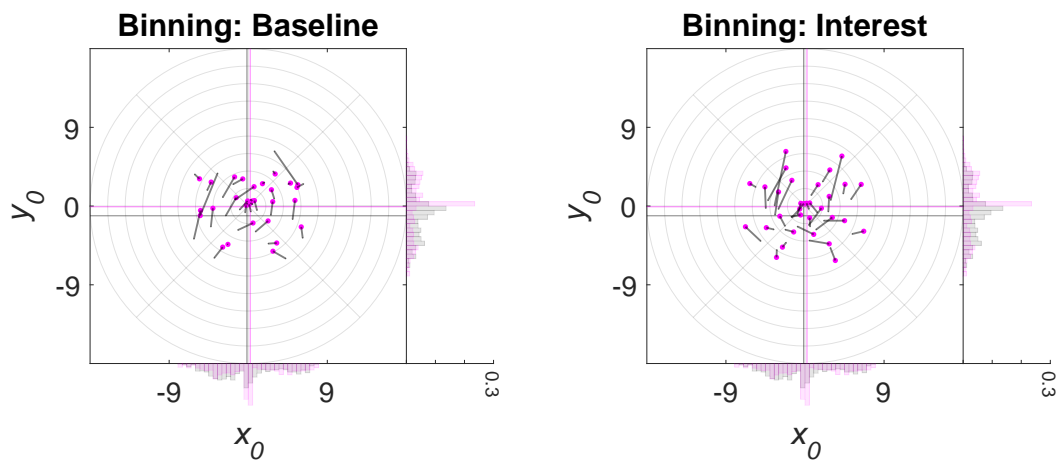

Figure S12. Empirical 2D post hoc binning analysis on  $x_0$  and  $y_0$  | Repeat data | 75<sup>th</sup> %ile participant | Dorsal — Without and with cross-thresholding. The same as in Figure S10, although here, we used the 75<sup>th</sup> %ile participant of the median  $R^2$  distribution.



A. Empirical repeat data | 75<sup>th</sup> %ile | Posterior

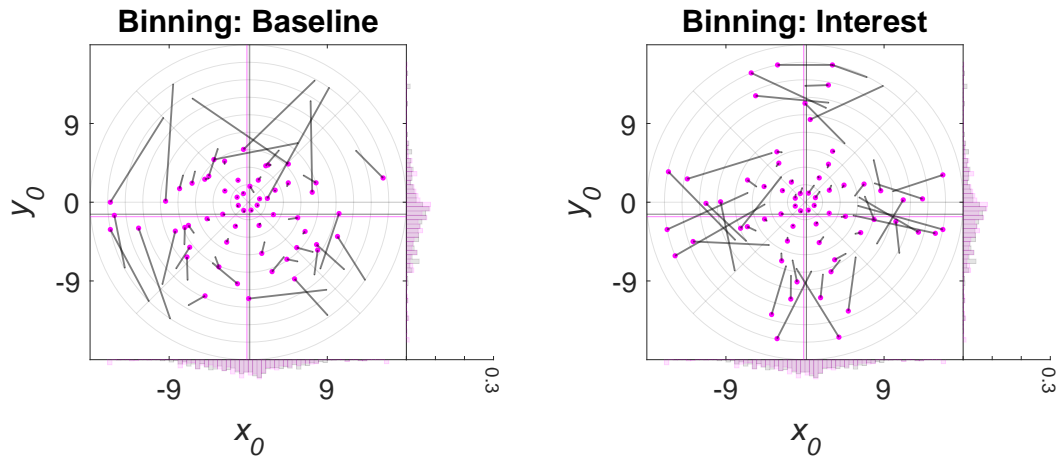

B. Empirical repeat data | 75<sup>th</sup> %ile | Posterior – Cross-thresholding (Baseline)

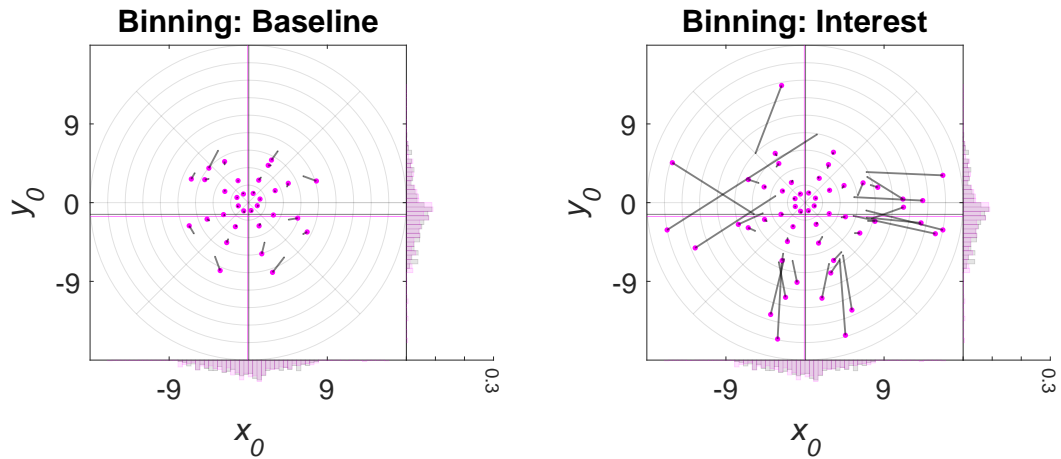

C. Empirical repeat data | 75<sup>th</sup> %ile | Posterior – Cross-thresholding (Baseline and Interest)

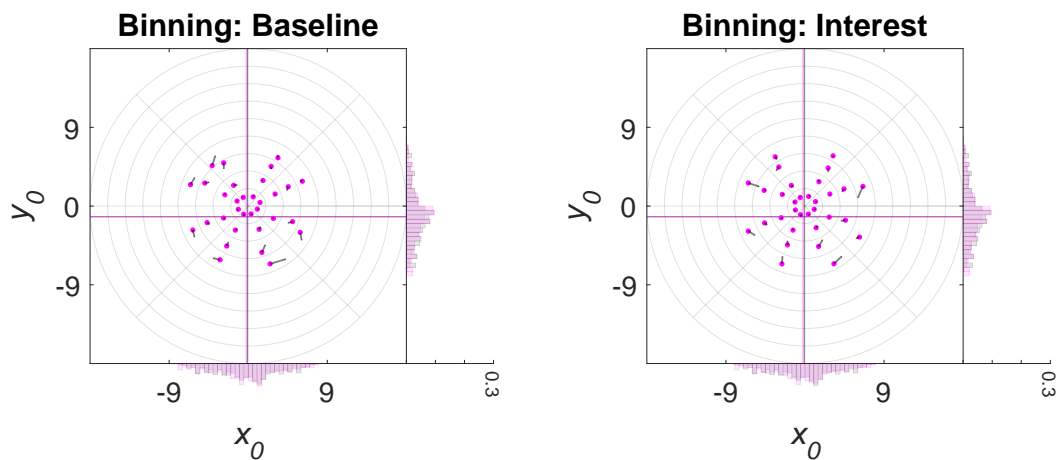

**Figure S13. Empirical 2D post hoc binning analysis on  $x_0$  and  $y_0$  | Repeat data | 75<sup>th</sup> %ile participant | Posterior — Without and with cross-thresholding.** The same as in [Figure S11](#), although here, we used the 75<sup>th</sup> %ile participant of the median  $R^2$  distribution.

634 **References**

635 Alvarez, I., de Haas, B., Clark, C.A., Rees, G., Schwarzkopf, D.S., 2015. Comparing different  
636 stimulus configurations for population receptive field mapping in human fMRI. *Front.*  
637 *Hum. Neurosci.* 9, 96. doi:[10.3389/fnhum.2015.00096](https://doi.org/10.3389/fnhum.2015.00096).

638 Amano, K., Wandell, B.A., Dumoulin, S.O., 2009. Visual field maps, population receptive  
639 field sizes, and visual field coverage in the human MT+ complex. *J. Neurophysiol.* 102,  
640 2704–2718. doi:[10.1152/jn.00102.2009](https://doi.org/10.1152/jn.00102.2009).

641 Ball, T.M., Squeglia, L.M., Tapert, S.F., Paulus, M.P., 2020. Double dipping in machine  
642 learning: Problems and solutions. *Biol. Psychiatry Cogn. Neurosci. Neuroimaging* 5, 261–  
643 263. doi:[10.1016/j.bpsc.2019.09.003](https://doi.org/10.1016/j.bpsc.2019.09.003).

644 Barnett, A.G., van der Pols, J.C., Dobson, A.J., 2005. Regression to the mean: What it is  
645 and how to deal with it. *Int. J. Epidemiol.* 34, 215–220. doi:[10.1093/ije/dyh299](https://doi.org/10.1093/ije/dyh299).

646 Barton, B., Brewer, A.A., 2015. fMRI of the rod scotoma elucidates cortical rod pathways  
647 and implications for lesion measurements. *Proc. Natl. Acad. Sci. U. S. A.* 112, 5201–5206.  
648 doi:[10.1073/pnas.1423673112](https://doi.org/10.1073/pnas.1423673112).

649 Benson, N.C., Butt, O.H., Brainard, D.H., Aguirre, G.K., 2014. Correction of distortion  
650 in flattened representations of the cortical surface allows prediction of V1-V3 functional  
651 organization from anatomy. *PLoS Comput. Biol.* 10, e1003538. doi:[10.1371/journal.pcbi.1003538](https://doi.org/10.1371/journal.pcbi.1003538).

653 Benson, N.C., Butt, O.H., Datta, R., Radoeva, P.D., Brainard, D.H., Aguirre, G.K., 2012.  
654 The retinotopic organization of striate cortex is well predicted by surface topology. *Curr.*  
655 *Biol.* 22, 2081–2085. doi:[10.1016/j.cub.2012.09.014](https://doi.org/10.1016/j.cub.2012.09.014).

656 Benson, N.C., Jamison, K.W., Arcaro, M.J., Vu, A.T., Glasser, M.F., Coalson, T.S., Van  
657 Essen, D.C., Yacoub, E., Ugurbil, K., Winawer, J., Kay, K., 2018. The Human Connectome  
658 Project 7 Tesla retinotopy dataset: Description and population receptive field analysis. *J.*  
659 *Vis.* 18, 1–22. doi:[10.1167/18.13.23](https://doi.org/10.1167/18.13.23).

660 Benson, N.C., Jamison, K.W., Arcaro, M.J., Vu, A.T., Glasser, M.F., Coalson, T.S., Van  
661 Essen, D.C., Yacoub, E., Ugurbil, K., Winawer, J., Kay, K., 2020. The HCP 7T Retinotopy  
662 Dataset. URL: [osf.io/bw9ec](https://osf.io/bw9ec).

663 Binda, P., Thomas, J.M., Boynton, G.M., Fine, I., 2013. Minimizing biases in estimating  
664 the reorganization of human visual areas with bold retinotopic mapping. *J. Vis.* 13, 1–16.  
665 doi:[10.1167/13.7.14](https://doi.org/10.1167/13.7.14).

666 Brainard, D.H., 1997. The Psychophysics Toolbox. *Spat. Vis.* 10, 433–436. doi:[10.1163/156856897X00357](https://doi.org/10.1163/156856897X00357), [arXiv:arXiv:1011.1669v3](https://arxiv.org/abs/1011.1669v3).

- 668 Breuer, F.A., Blaimer, M., Heidemann, R.M., Mueller, M.F., Griswold, M.A., Jakob, P.M.,  
669 2005. Controlled aliasing in parallel imaging results in higher acceleration (CAIPIRINHA)  
670 for multi-slice imaging. *Magn. Reson. Med.* 53, 684–691. doi:[10.1002/mrm.20401](https://doi.org/10.1002/mrm.20401).
- 671 Brewer, C.A., Harrower, M., University, T.P.S., 2021. ColorBrewer [Web tool]. URL: <https://colorbrewer2.org>.  
672
- 673 Campbell, D.T., Kenny, D.A., 1999. A primer on regression artifacts. Guilford Press, New  
674 York, NY.
- 675 Carvalho, J., Invernizzi, A., Ahmadi, K., Hoffmann, M.B., Renken, R.J., Cornelissen, F.W.,  
676 2020. Micro-probing enables fine-grained mapping of neuronal populations using fMRI.  
677 *Neuroimage* 209, 116423. doi:[10.1016/j.neuroimage.2019.116423](https://doi.org/10.1016/j.neuroimage.2019.116423).
- 678 Cohen, J., Cohen, P., West, S.G., Aiken, L.S., 2003. Applied multiple regression/correlation  
679 analysis for the behavioral sciences. Lawrence Erlbaum Associates, Mahwah, NJ.
- 680 Dale, A.M., Fischl, B., Sereno, M.I., 1999. Cortical surface-based analysis: I. Segmentation  
681 and surface reconstruction. *Neuroimage* 9, 179–194. doi:[10.1006/nimg.1998.0395](https://doi.org/10.1006/nimg.1998.0395),  
682 [arXiv:nimg.1998.0396](https://arxiv.org/abs/nimg.1998.0396).
- 683 van Dijk, J.A., de Haas, B., Moutsiana, C., Schwarzkopf, D.S., 2016. Intersession reliability  
684 of population receptive field estimates. *Neuroimage* 143, 293–303. doi:[10.1016/j.neuroi  
685 mage.2016.09.013](https://doi.org/10.1016/j.neuroimage.2016.09.013).
- 686 Dumoulin, S.O., Knapen, T., 2018. How visual cortical organization is altered by ophthal-  
687 mologic and neurologic disorders. *Annu. Rev. Vis. Sci.* 4, 357–379. doi:[10.1146/annure  
688 v-vision-091517-033948](https://doi.org/10.1146/annurev-v-vision-091517-033948).
- 689 Dumoulin, S.O., Wandell, B.A., 2008. Population receptive field estimates in human visual  
690 cortex. *Neuroimage* 39, 647–660. doi:[10.1016/j.neuroimage.2007.09.034](https://doi.org/10.1016/j.neuroimage.2007.09.034).
- 691 Engel, S.A., Glover, G.H., Wandell, B.A., 1997. Retinotopic organization in human visual  
692 cortex and the spatial precision of functional MRI. *Cereb. Cortex* 7, 181–192. doi:[10.109  
693 3/cercor/7.2.181](https://doi.org/10.1093/cercor/7.2.181).
- 694 Eriksson, K., Häggström, O., 2014. Lord’s paradox in a continuous setting and a regression  
695 artifact in numerical cognition research. *PLoS One* 9, e95949. doi:[10.1371/journal.po  
696 ne.0095949](https://doi.org/10.1371/journal.pone.0095949).
- 697 van Es, D.M., Theeuwes, J., Knapen, T., 2018. Spatial sampling in human visual cortex is  
698 modulated by both spatial and feature-based attention. *Elife* 7, e36928. doi:[10.7554/eL  
699 ife.36928](https://doi.org/10.7554/eLife.36928).

- 700 Fischl, B., Sereno, M.I., Dale, A.M., 1999. Cortical surface-based analysis: II. Inflation,  
701 flattening, and a surface-based coordinate system. *Neuroimage* 9, 195–207. doi:[10.1006/  
702 nimg.1998.0396](https://doi.org/10.1006/nimg.1998.0396), [arXiv:nimg.1998.0396](https://arxiv.org/abs/nimg.1998.0396).
- 703 Galton, F., 1886. Regression towards mediocrity in hereditary stature. *J. Anthro-*  
704 *pol. Inst. Gt. Britain Irel.* 1, 246–263. doi:[10.1017/CB09781107415324.004](https://doi.org/10.1017/CB09781107415324.004),  
705 [arXiv:arXiv:1011.1669v3](https://arxiv.org/abs/arXiv:1011.1669v3).
- 706 Gignac, G.E., Zajenkowski, M., 2020. The Dunning-Kruger effect is (mostly) a statistical  
707 artefact: Valid approaches to testing the hypothesis with individual differences data. *In-*  
708 *telligence* 80, 101449. doi:[10.1016/j.intell.2020.101449](https://doi.org/10.1016/j.intell.2020.101449).
- 709 Haak, K.V., Cornelissen, F.W., Morland, A.B., 2012. Population receptive field dynamics in  
710 human visual cortex. *PLoS One* 7, e37686. doi:[10.1371/journal.pone.0037686](https://doi.org/10.1371/journal.pone.0037686).
- 711 de Haas, B., Schwarzkopf, D.S., Anderson, E.J., Rees, G., 2014. Perceptual load affects  
712 spatial tuning of neuronal populations in human early visual cortex. *Curr. Biol.* 24, R66–  
713 R67. [Retracted, 2020, *Cur. Biol.*, 30, 4814]. doi:[10.1016/j.cub.2013.11.061](https://doi.org/10.1016/j.cub.2013.11.061).
- 714 de Haas, B., Schwarzkopf, D.S., Anderson, E.J., Rees, G., 2020. Retraction notice to: Per-  
715 ceptual load affects spatial tuning of neuronal populations in human early visual cortex.  
716 *Curr. Biol.* 30, 4814. doi:[10.1016/j.cub.2020.11.015](https://doi.org/10.1016/j.cub.2020.11.015).
- 717 Holmes, N.P., 2009. The principle of inverse effectiveness in multisensory integration: Some  
718 statistical considerations. *Brain Topogr.* 21, 168–176. doi:[10.1007/s10548-009-0097-2](https://doi.org/10.1007/s10548-009-0097-2).
- 719 Infanti, E., Schwarzkopf, D.S., 2020. Mapping sequences can bias population receptive field  
720 estimates. *Neuroimage* 211, 116636. doi:[10.1016/j.neuroimage.2020.116636](https://doi.org/10.1016/j.neuroimage.2020.116636).
- 721 Kay, K.N., Winawer, J., Mezer, A., Wandell, B.A., 2013. Compressive spatial summation in  
722 human visual cortex. *J. Neurophysiol.* 110, 481–494. doi:[10.1152/jn.00105.2013](https://doi.org/10.1152/jn.00105.2013).
- 723 Kenny, D.A., 2005. Regression artifacts, in: B. S. Everitt & D. C. Howell (Ed.), *Encycl. Stat.*  
724 *Behav. Sci.*. Chichester, UK, pp. 1723–1725.
- 725 Kilner, J.M., 2013. Bias in a common EEG and MEG statistical analysis and how to avoid  
726 it. *Clin. Neurophysiol.* 124, 2062–2063. doi:[10.1016/j.clinph.2013.03.024](https://doi.org/10.1016/j.clinph.2013.03.024).
- 727 Klein, B.P., Harvey, B.M., Dumoulin, S.O., 2014. Attraction of position preference by spatial  
728 attention throughout human visual cortex. *Neuron* 84, 227–237. doi:[10.1016/j.neuron.2  
729 014.08.047](https://doi.org/10.1016/j.neuron.2014.08.047).
- 730 Kleiner, M., Brainard, D.H., Pelli, D.G., Broussard, C., Wolf, T., Niehorster, D., 2007.  
731 What’s new in Psychtoolbox-3? [ECP abstract supplement]. *Perception* 36. doi:[http:  
732 //journals.sagepub.com/doi/10.1177/03010066070360S101](http://journals.sagepub.com/doi/10.1177/03010066070360S101).

- 733 Kriegeskorte, N., Simmons, W.K., Bellgowan, P.S., Baker, C.I., 2009. Circular analysis  
734 in systems neuroscience: The dangers of double dipping. *Nat. Neurosci.* 12, 535–540.  
735 doi:[10.1038/nn.2303](https://doi.org/10.1038/nn.2303).
- 736 Lagarias, J.C., Reeds, J.A., Wright, M.H., Wright, P.E., 1998. Convergence properties of the  
737 Nelder-Mead simplex method in low dimensions. *SIAM J. Optim.* 9, 112–147. doi:[10.1137/S1052623496303470](https://doi.org/10.1137/S1052623496303470).
- 739 Le, R., Witthoft, N., Ben-Shachar, M., Wandell, B., 2017. The field of view available to the  
740 ventral occipito-temporal reading circuitry. *J. Vis.* 17, 1–19. doi:[10.1167/17.4.6](https://doi.org/10.1167/17.4.6).
- 741 Lerma-Usabiaga, G., Benson, N., Winawer, J., Wandell, B.A., 2020. A validation framework  
742 for neuroimaging software: The case of population receptive fields. *PLOS Comput. Biol.*  
743 16, e1007924. doi:[10.1371/journal.pcbi.1007924](https://doi.org/10.1371/journal.pcbi.1007924).
- 744 Makin, T.R., De Xivry, J.J.O., 2019. Ten common statistical mistakes to watch out for when  
745 writing or reviewing a manuscript. *Elife* 8, e48175. doi:[10.7554/eLife.48175](https://doi.org/10.7554/eLife.48175).
- 746 Morgan, C., Schwarzkopf, D.S., 2020. Comparison of human population receptive field es-  
747 timates between scanners and the effect of temporal filtering. *F1000Research* 8, 1681.  
748 doi:[10.12688/f1000research.20496.2](https://doi.org/10.12688/f1000research.20496.2).
- 749 Nelder, J.A., Mead, R., 1965. A simplex method for function minimization. *Comput. J.* 7,  
750 308–313. doi:[10.1093/comjnl/7.4.308](https://doi.org/10.1093/comjnl/7.4.308).
- 751 Neuwirth, E., 2014. RColorBrewer: ColorBrewer palettes [Computer software]. URL: <https://cran.r-project.org/package=RColorBrewer>.
- 753 Pelli, D.G., 1997. The VideoToolbox software for visual psychophysics: Transforming num-  
754 bers into movies. *Spat. Vis.* 10, 437–442. doi:[10.1163/156856897X00366](https://doi.org/10.1163/156856897X00366).
- 755 Prabhakaran, G.T., Carvalho, J., Invernizzi, A., Kanowski, M., Renken, R.J., Cornelissen,  
756 F.W., Hoffmann, M.B., 2020. Foveal pRF properties in the visual cortex depend on the  
757 extent of stimulated visual field. *Neuroimage* 222, 117250. doi:[10.1016/j.neuroimage.2020.117250](https://doi.org/10.1016/j.neuroimage.2020.117250).
- 759 Preacher, K.J., MacCallum, R.C., Rucker, D.D., Nicewander, W.A., 2005. Use of the extreme  
760 groups approach: A critical reexamination and new recommendations. *Psychol. Methods*  
761 10, 178–192. doi:[10.1037/1082-989X.10.2.178](https://doi.org/10.1037/1082-989X.10.2.178).
- 762 R Core Team, 2018. R: A Language and environment for statistical computing [Computer  
763 software].
- 764 Schellekens, W., Petridou, N., Ramsey, N.F., 2018. Detailed somatotopy in primary motor  
765 and somatosensory cortex revealed by Gaussian population receptive fields. *Neuroimage*  
766 179, 337–347. doi:[10.1016/j.neuroimage.2018.06.062](https://doi.org/10.1016/j.neuroimage.2018.06.062).

- 767 Schwarz, W., Reike, D., 2018. Regression away from the mean: Theory and examples. Br.  
768 J. Math. Stat. Psychol. 71, 186–203. doi:[10.1111/bmsp.12106](https://doi.org/10.1111/bmsp.12106).
- 769 Senden, M., Reithler, J., Gijzen, S., Goebel, R., 2014. Evaluating population receptive field  
770 estimation frameworks in terms of robustness and reproducibility. PLoS One 9, e114054.  
771 doi:[10.1371/journal.pone.0114054](https://doi.org/10.1371/journal.pone.0114054).
- 772 Sereno, M.I., Dale, A.M., Reppas, J.B., Kwong, K.K., Belliveau, J.W., Brady, T.J., Rosen,  
773 B.R., Tootell, R.B., 1995. Borders of multiple visual areas in humans revealed by functional  
774 magnetic resonance imaging. Science (80-. ). 268, 889–893. doi:[10.1126/science.7754376](https://doi.org/10.1126/science.7754376).
- 775 Shanks, D.R., 2017. Regressive research: The pitfalls of post hoc data selection in the study  
776 of unconscious mental processes. Psychon. Bull. Rev. 24, 752–775. doi:[10.3758/s13423-0](https://doi.org/10.3758/s13423-016-1170-y)  
777 [16-1170-y](https://doi.org/10.3758/s13423-016-1170-y).
- 778 Stigler, S.M., 1997. Regression towards the mean, historically considered. Stat. Methods  
779 Med. Res. 6, 103–114. doi:[10.1177/096228029700600202](https://doi.org/10.1177/096228029700600202).
- 780 Stoll, S., Infanti, E., Schwarzkopf, D.S., 2022. The impact of multifocal attention on popu-  
781 lation receptive fields in human visual cortex - A tale of unexpected complexities [Poster  
782 presentation]. doi:<https://doi.org/10.17605/OSF.IO/G4HD2>.
- 783 Tsouli, A., Cai, Y., van Ackooij, M., Hofstetter, S., Harvey, B.M., te Pas, S.F., van der Smagt,  
784 M.J., Dumoulin, S.O., 2021. Adaptation to visual numerosity changes neural numerosity  
785 selectivity. Neuroimage 229, 117794. doi:[10.1016/j.neuroimage.2021.117794](https://doi.org/10.1016/j.neuroimage.2021.117794).
- 786 Vo, V.A., Sprague, T.C., Serences, J.T., 2017. Spatial tuning shifts increase the discrim-  
787 inability and fidelity of population codes in visual cortex. J. Neurosci. 37, 3386–3401.  
788 doi:[10.1523/JNEUROSCI.3484-16.2017](https://doi.org/10.1523/JNEUROSCI.3484-16.2017).
- 789 Vul, E., Harris, C., Winkielman, P., Pashler, H., 2009. Puzzlingly high correlations in fMRI  
790 studies of emotion, personality, and social cognition. Perspect. Psychol. Sci. 4, 319–324.  
791 doi:[10.1111/j.1745-6924.2009.01132.x](https://doi.org/10.1111/j.1745-6924.2009.01132.x).
- 792 Wandell, B.A., Dumoulin, S.O., Brewer, A.A., 2007. Visual field maps in human cortex.  
793 Neuron 56, 366–383. doi:[10.1016/j.neuron.2007.10.012](https://doi.org/10.1016/j.neuron.2007.10.012).
- 794 Wang, L., Mruczek, R.E., Arcaro, M.J., Kastner, S., 2015. Probabilistic maps of visual  
795 topography in human cortex. Cereb. Cortex 25, 3911–3931. doi:[10.1093/cercor/bhu277](https://doi.org/10.1093/cercor/bhu277).
- 796 Yildirim, F., Carvalho, J., Cornelissen, F.W., 2018. A second-order orientation-contrast  
797 stimulus for population-receptive-field-based retinotopic mapping. Neuroimage 164, 183–  
798 193. doi:[10.1016/j.neuroimage.2017.06.073](https://doi.org/10.1016/j.neuroimage.2017.06.073).
